# Supplementary material for: Experimental and computational insights into the nature of weak intermolecular interactions in trifluoromethyl-substituted isomeric crystalline N-methyl-N-phenylbenzamides
Source: Royal Society of Chemistry journal article supplement (doi:10.1039/c5nj01670c), 2015-01-01

## Supporting Information

### Experimental and computational insights into the nature of weak intermolecular interactions in trifluoromethyl substituted isomeric crystalline *N*-methyl-*N*-phenylbenzamides.

Piyush Panini<sup>a</sup>, Deepak Chopra<sup>a\*</sup>

<sup>a</sup> Crystallography and Crystal Chemistry Laboratory, Department of Chemistry, Indian Institute of Science Education and Research Bhopal, Madhya Pradesh, India-462066. Fax: 91-0755-6692370. Email: dchopra@iiserb.ac.in

**Section1. List of synthesized compounds along with their synthesized yields (after column), melting points (from DSC, onset value), and spectroscopic characterization (FTIR, <sup>1</sup>H NMR):**

- 1. *N*-methyl-*N*-phenyl-2-(trifluoromethyl)benzamide (NM01):** Colourless thick oil; yield = 78%; M.P. = not determined; FTIR (in cm<sup>-1</sup>: KBr): 3066, 2930, 1660; <sup>1</sup>H NMR (400MHz, CDCl<sub>3</sub>): δ 7.56 (d, *J* = 6.67Hz, 1H), 7.30 (m, 2H), 7.20 (t, *J* = 7.06 Hz, 2H), 7.11 (m, 4H), 3.53 (s, 3H).
- (a) *N*-methyl-*N*-phenyl-3-(trifluoromethyl)benzamide (NM02):** White solid; yield = 84%; M.P. = 65°C; FTIR (in cm<sup>-1</sup>: NaCl round cell plate): 3066, 2930, 1651; <sup>1</sup>H NMR (400MHz, CDCl<sub>3</sub>): δ 7.58 (s, 1H), 7.49 (t, *J* = 7.43 Hz, 2H), 7.28 (m, 3H), 7.19 (tt, *J* = 7.43 Hz, 1.44 Hz, 1H), 7.05 (d, *J* = 7.43 Hz, 2H), 3.53 (s, 3H)
- 2. *N*-methyl-*N*-phenyl-4-(trifluoromethyl)benzamide (NM03):** White solid; yield = 91%; M.P. = 86°C; FTIR (in cm<sup>-1</sup>: NaCl round cell plate): 3064, 2932, 1658; <sup>1</sup>H NMR (400MHz, CDCl<sub>3</sub>): δ 7.43 (dt, *J* = 10.87 Hz, 4.25Hz, 4H), 7.27 (tt, *J* = 7.26 Hz, 1.70 Hz, 2H), 7.19 (tt, *J* = 7.35Hz, 1.43 Hz, 1H), 7.05 (d, *J* = 7.35 Hz, 2H), 3.53 (s, 3H).

3. ***N*-methyl-*N*-(2-(trifluoromethyl)phenyl)benzamide (NM10):** White solid; yield = 88%; M.P. 74°C =; FTIR (in cm<sup>-1</sup>: NaCl round cell plate): 3066, 2925, 1658; <sup>1</sup>H NMR (400MHz, CDCl<sub>3</sub>): δ 7.65 (d, *J* = 7.44 Hz, 2H), 7.45 (m, 3H), 7.36 (t, *J* = 7.44 Hz, 1H), 7.21 (d, *J* = 6.65 Hz, 1H), 7.16 (d, *J* = 7.00 Hz, 3H), 3.45 (s, 3H).
4. ***N*-methyl-*N*-(3-(trifluoromethyl)phenyl)benzamide (NM20):** Colourless thick oil; yield = 81%; M.P. = not determined; FTIR (in cm<sup>-1</sup>: NaCl round cell plate): 3063, 2930, 1659; <sup>1</sup>H NMR (400MHz, CDCl<sub>3</sub>): δ 7.41 (d, *J* = 7.76 Hz, 1H), 7.35 (m, 2H), 7.29 (m, 2H), 7.22 (d, *J* = 7.42, 3H), 3.54 (s, 3H).
5. ***N*-methyl-*N*-(4-(trifluoromethyl)phenyl)benzamide (NM30):** White low melting solid; yield = 86 %; M.P. = 39°C; FTIR (in cm<sup>-1</sup>: NaCl round cell plate): 3062, 2931, 1659; <sup>1</sup>H NMR (400MHz, CDCl<sub>3</sub>): 7.51 (d, *J* = 8.29 Hz, 2H), 7.31 (m, 3H), 7.23 (m, 2H), 7.17 (d, *J* = 8.29 Hz, 2H), 3.54 (s, 3H).
6. ***N*-methyl-2-(trifluoromethyl)-*N*-(2-(trifluoromethyl)phenyl)benzamide (NM11):** White solid; yield = 93 %; M.P. = 88°C; FTIR (in cm<sup>-1</sup>: NaCl round cell plate): 3074, 2923, 1667; <sup>1</sup>H NMR (400MHz, CDCl<sub>3</sub>): δ 7.81 (d, *J* = 7.95Hz, 1H), 7.78 (d, *J* = 7.95Hz, 1H), 7.70 (qn, *J* = 9.00Hz, 2H), 7.60 (d, *J* = 7.73 Hz, 1H), 7.55 (q, *J* = 7.45, 2H), 7.45 (d, *J* = 7.73Hz, 1H), 3.11 (s, 3H).
7. ***N*-methyl-3-(trifluoromethyl)-*N*-(2-(trifluoromethyl)phenyl)benzamide (NM12):** White solid; yield = 91 %; M.P. = 58°C; FTIR (in cm<sup>-1</sup>: NaCl round cell plate): 3076, 2944, 1661; <sup>1</sup>H NMR (400MHz, CDCl<sub>3</sub>): δ 7.66 (d, *J* = 7.70 Hz, 1H), 7.54 (s, 1H), 7.49 (t, *J* = 6.80 Hz, 3H), 7.41 (t, *J* = 7.43 Hz, 1H), 7.30 (t, *J* = 7.42 Hz, 1H), 7.22 (d, *J* = 7.77 Hz, 1H), 3.47 (s, 3H).
8. ***N*-methyl-4-(trifluoromethyl)-*N*-(2-(trifluoromethyl)phenyl)benzamide (NM13):** Colourless thick oil; yield = 81%; M.P. = not determined; FTIR (in cm<sup>-1</sup>: NaCl round cell plate): 3069, 2930, 1652; <sup>1</sup>H NMR (400MHz, CDCl<sub>3</sub>): δ 7.48 (m, 3H), 7.40 (t, *J* = 7.73 Hz, 3H), 7.36 (d, *J* = 7.72 Hz, 1H), 7.21 (d, *J* = 7.72 Hz, 1H), 3.55 (s, 3H).
9. ***N*-methyl-2-(trifluoromethyl)-*N*-(3-(trifluoromethyl)phenyl)benzamide (NM21):** Colourless thick oil; yield = 88%; M.P. = not determined; FTIR (in cm<sup>-1</sup>: NaCl round cell plate): 3072, 2926, 1664; <sup>1</sup>H NMR (400MHz, CDCl<sub>3</sub>): δ 7.68 (s, 1H), 7.57 (m, 2H), 7.34 (m, 4H), 7.15 (s, 1H), 3.56 (s, 3H).

- 10. *N*-methyl-3-(trifluoromethyl)-*N*-(3-(trifluoromethyl)phenyl)benzamide (NM22):**  
White solid; yield = 89 %; M.P. = 60°C; FTIR (in cm<sup>-1</sup>: NaCl round cell plate): 3070, 2930, 1660; <sup>1</sup>H NMR (400MHz, CDCl<sub>3</sub>): δ 7.55 (d, *J* = 8.42 Hz, 2H), 7.48 (t, *J* = 9.05 Hz, 2H), 7.38 (m, 3H), 7.23 (d, *J* = 7.96Hz, 1H), 3.56 (s, 3H).
- 11. *N*-methyl-4-(trifluoromethyl)-*N*-(3-(trifluoromethyl)phenyl)benzamide (NM23):**  
White solid; yield = 93 %; M.P. = 67°C; FTIR (in cm<sup>-1</sup>: NaCl round cell plate): 3069, 2932, 1660; <sup>1</sup>H NMR (400MHz, CDCl<sub>3</sub>): δ 7.48 (m, 3H), 7.40 (t, *J* = 7.01 Hz, 3H), 7.36 (d, *J* = 7.43 Hz, 1H), 7.21 (d, *J* = 7.85 Hz, 1H), 3.55 (s, 3H).
- 12. *N*-methyl-2-(trifluoromethyl)-*N*-(4-(trifluoromethyl)phenyl)benzamide (NM31):**  
White solid; yield = 87 %; M.P. = 72°C; FTIR (in cm<sup>-1</sup>: NaCl round cell plate): 3071, 2931, 1667; <sup>1</sup>H NMR (400MHz, CDCl<sub>3</sub>): δ 7.61 (d, *J* = 7.84Hz, 2H), 7.48 (d, *J* = 6.90Hz, 2H), 7.36 (t, *J* = 6.93Hz, 2H), 7.20 (d, *J* = 6.90Hz, 2H), 3.56 (s, 3H).
- 13. *N*-methyl-3-(trifluoromethyl)-*N*-(4-(trifluoromethyl)phenyl)benzamide (NM32):**  
Colourless thick oil; yield = 90%; M.P. = not determined; FTIR (in cm<sup>-1</sup>: NaCl round cell plate): 3075, 2930, 1660; <sup>1</sup>H NMR (400MHz, CDCl<sub>3</sub>): δ 7.59 (s, 1H), 7.55 (t, *J* = 9.11Hz, 3H), 7.48 (d, *J* = 7.56Hz, 1H), 7.36 (t, *J* = 7.83Hz, 1H), 7.18 (d, *J* = 7.90Hz, 2H), 3.56 (s, 3H).
- 14. *N*-methyl-4-(trifluoromethyl)-*N*-(4-(trifluoromethyl)phenyl)benzamide (NM33):**  
White solid; yield = 93 %; M.P. = 66°C; FTIR (in cm<sup>-1</sup>: NaCl round cell plate): 3066, 2931, 1659; <sup>1</sup>H NMR (400MHz, CDCl<sub>3</sub>): δ 7.54 (t, *J* = 7.65 Hz, 3H), 7.50 (s, 1H), 7.44 (d, *J* = 8.31 Hz, 2H), 7.18 (d, *J* = 8.02 Hz, 2H), 3.55 (s, 3H).

**Table S1: Details of Crystallization Experiments:**

| Sl. No. | Compound Code     | Solvent and Crystallization conditions <sup>a</sup>                                 |
|---------|-------------------|-------------------------------------------------------------------------------------|
| 1.      | NM02              | Hexane (5°C), Chloroform (5°C),                                                     |
| 2.      | NM03              | Hexane (5°C)                                                                        |
| 3.      | NM10              | Hexane (5°C), Ether (-20°C), Dichloromethane (5°C), Chloroform (5°C), Benzene (5°C) |
| 4.      | NM30 <sup>b</sup> | -----                                                                               |

|     |      |                                                                                         |
|-----|------|-----------------------------------------------------------------------------------------|
| 5.  | NM11 | Hexane (5°C), Ether (-20°C), Methanol (RT),<br>Dichloromethane + cyclohexane (1:1, 5°C) |
| 6.  | NM12 | Hexane (5°C), Ether (-20°C)                                                             |
| 7.  | NM22 | Dichloromethane (5°C), Hexane (5°C)                                                     |
| 8.  | NM23 | Hexane (5°C)                                                                            |
| 9.  | NM31 | Hexane (5°C), Dichloromethane (5°C)                                                     |
| 10. | NM33 | Hexane (5°C), Dichloromethane + cyclohexane (1:1, 5°C)                                  |

<sup>a</sup> All crystals, crystallized from different solvents or conditions for a particular compound, were found to be of the same phase. <sup>b</sup> No solid aggregate could be obtained after crystallization from any solvent. Single crystal of **NM30** was observed directly in the sample vial.

**Figure S1: IR-Spectra of the compounds:** All IR spectra were recorded on NaCl round cell plate on Perkin Elmer instrument.

**(a) NM01:**

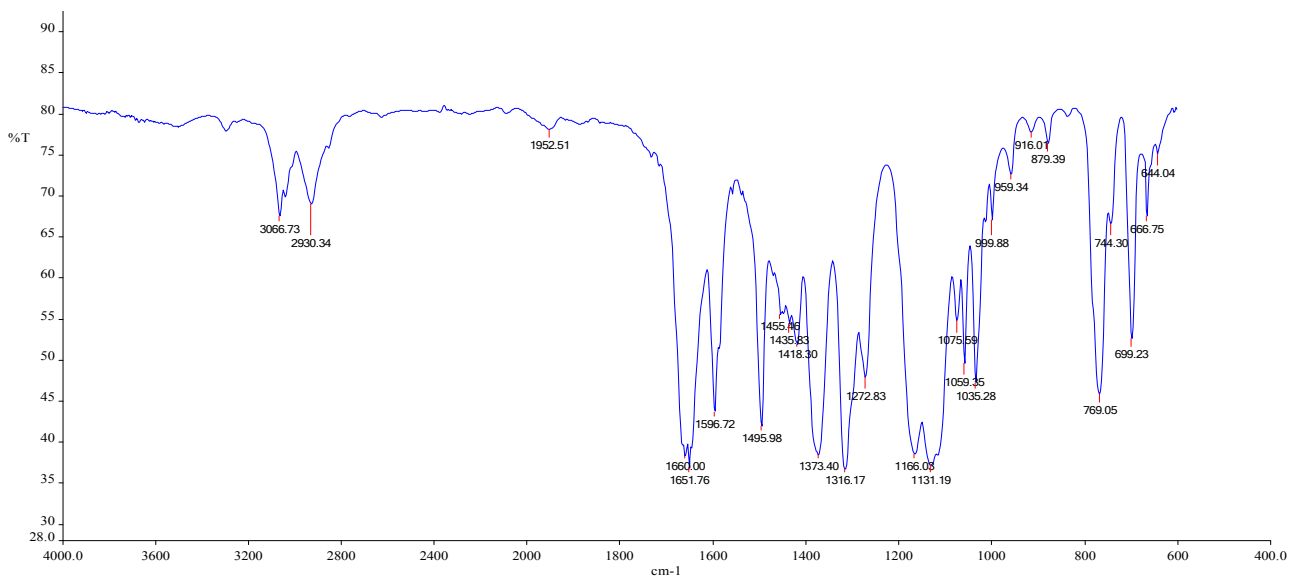

**(b) NM02:**

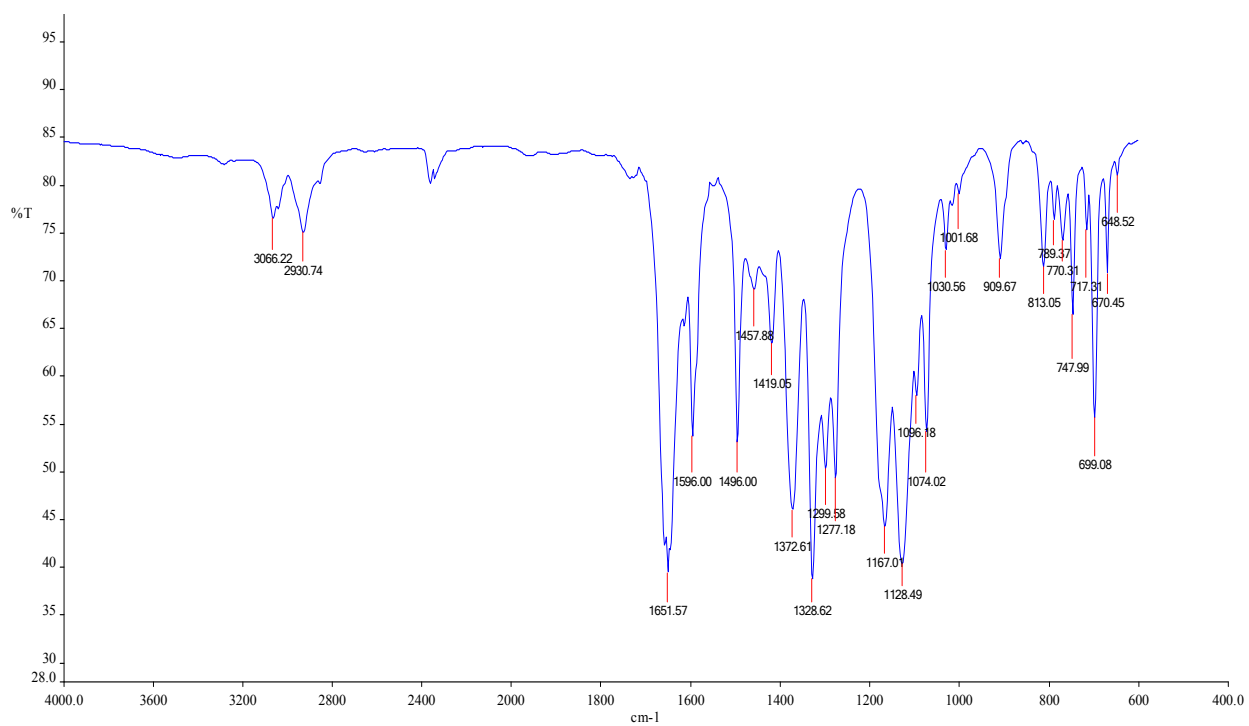

(c) NM03:

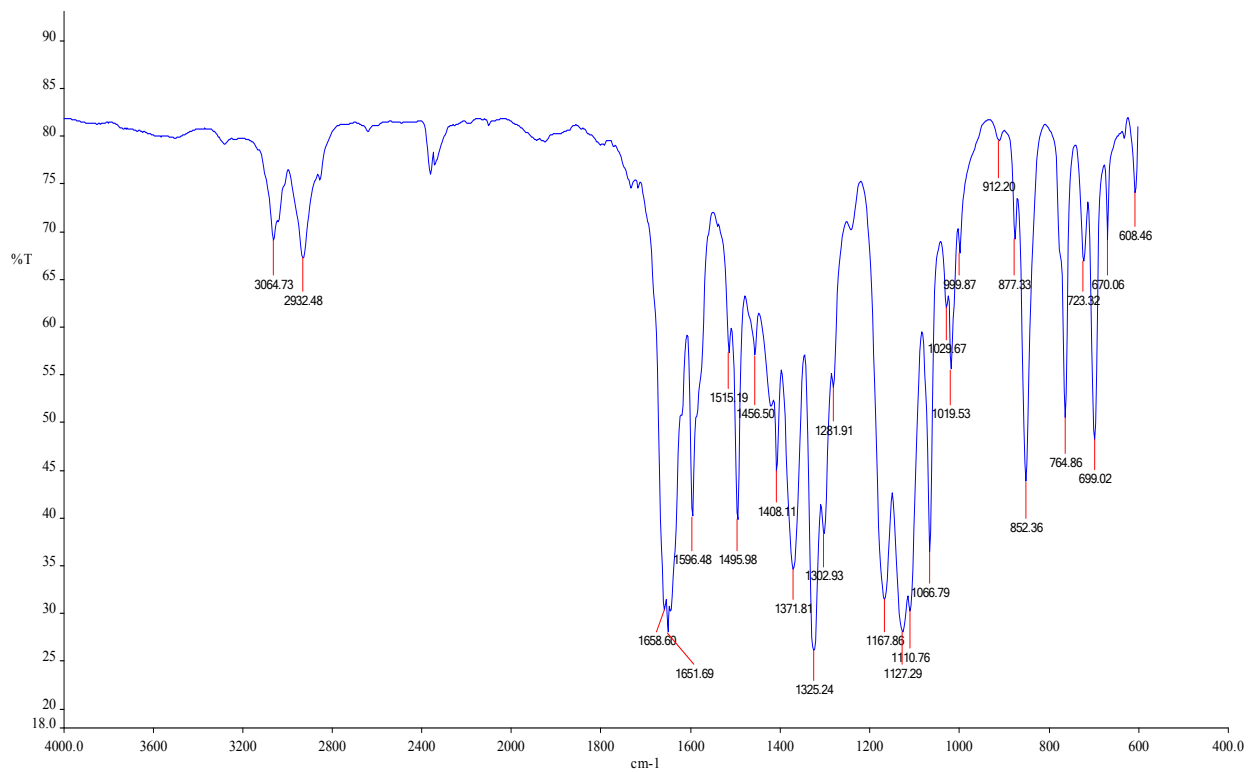

**(d) NM10:**

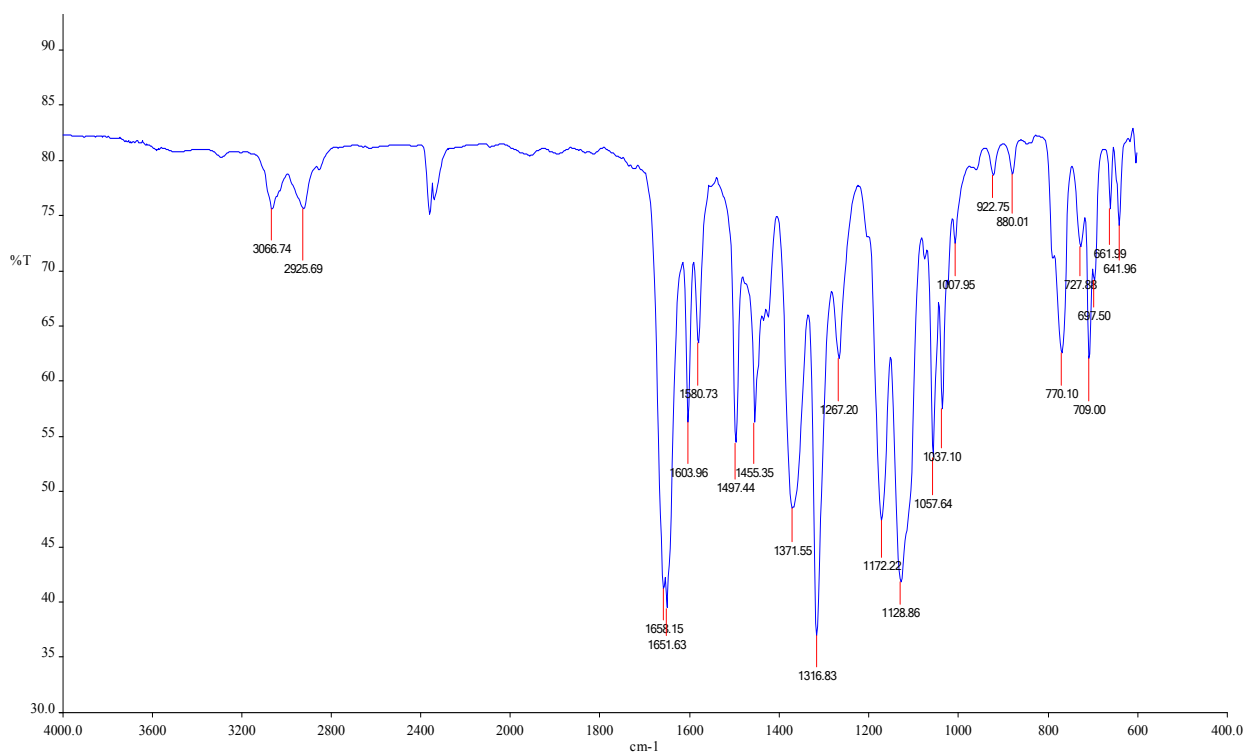

**(e) NM20:**

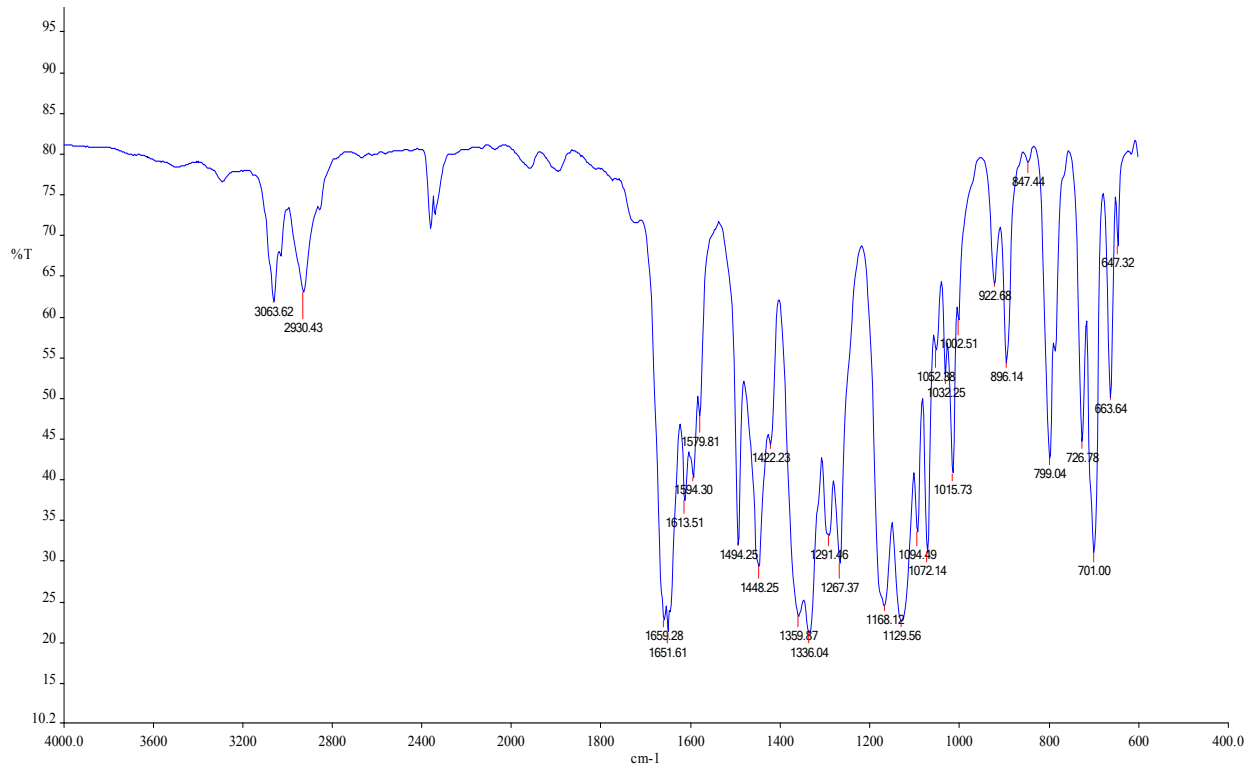

**(f) NM30:**

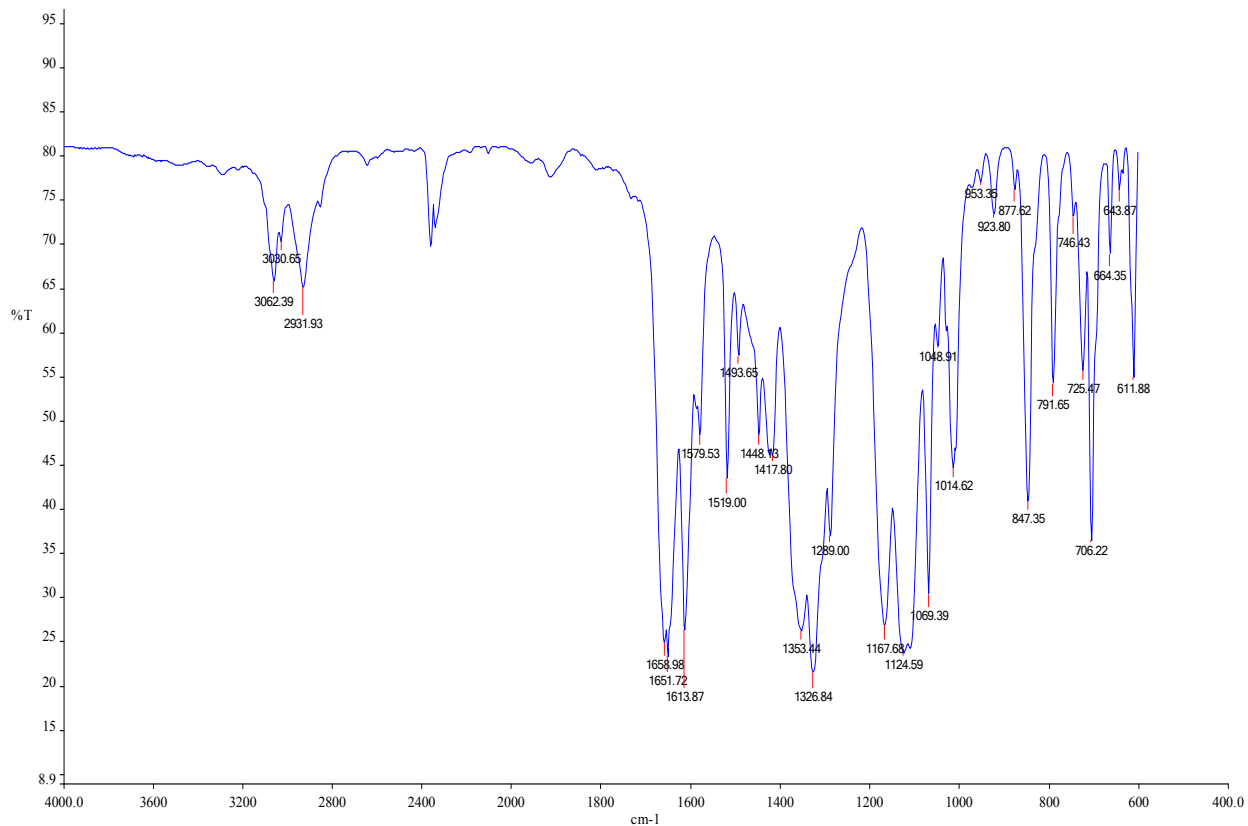

**(g) NM11:**

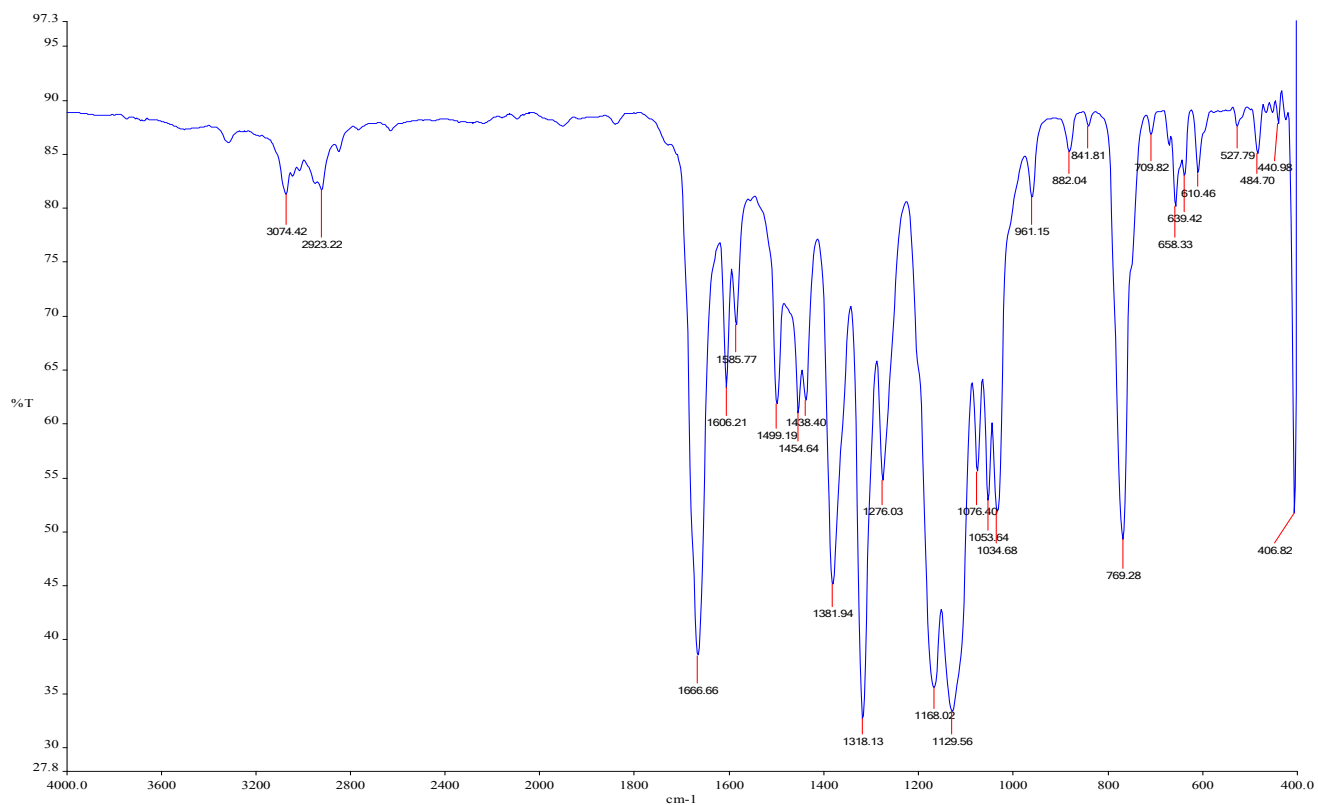



**(h) NM12:**

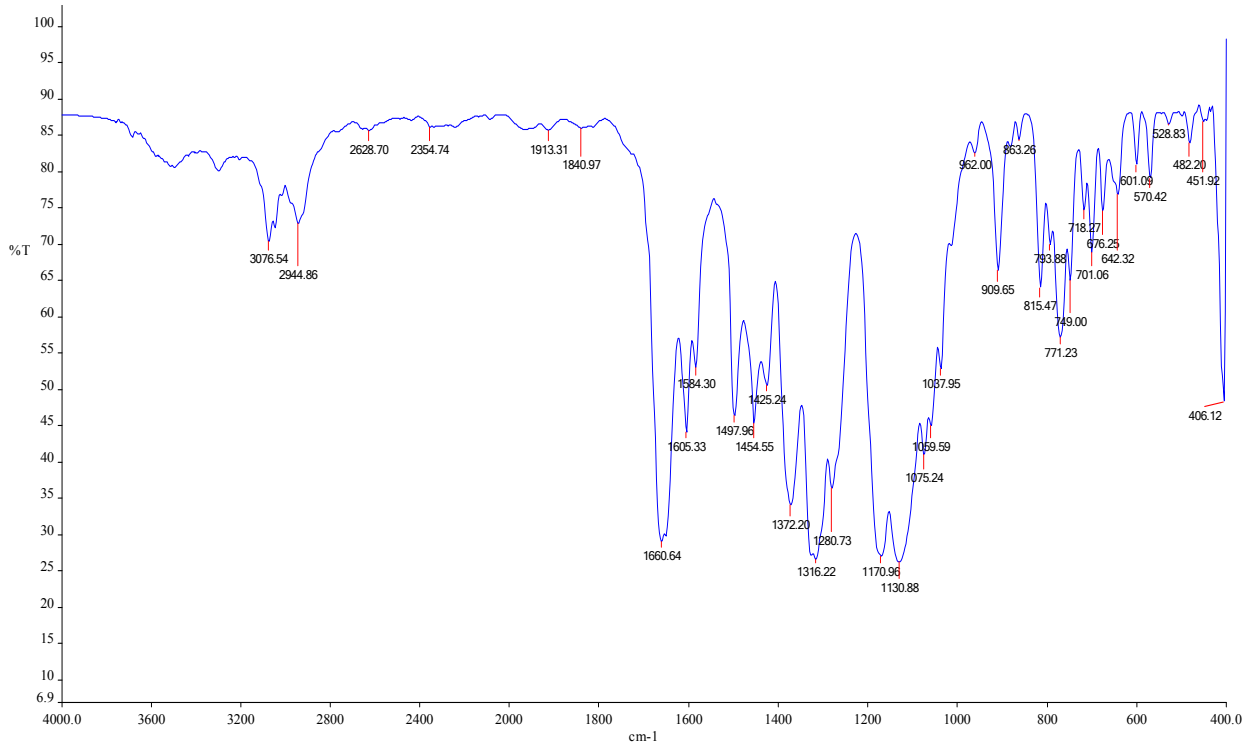

**(i) NM13:**

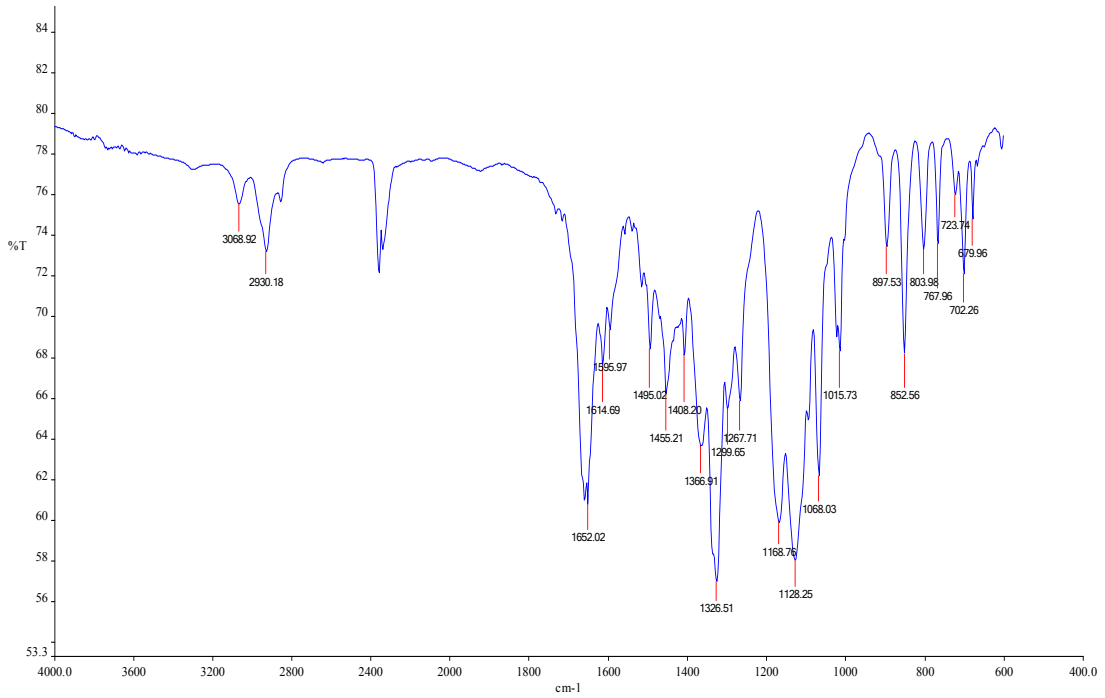

**(j) NM21:**

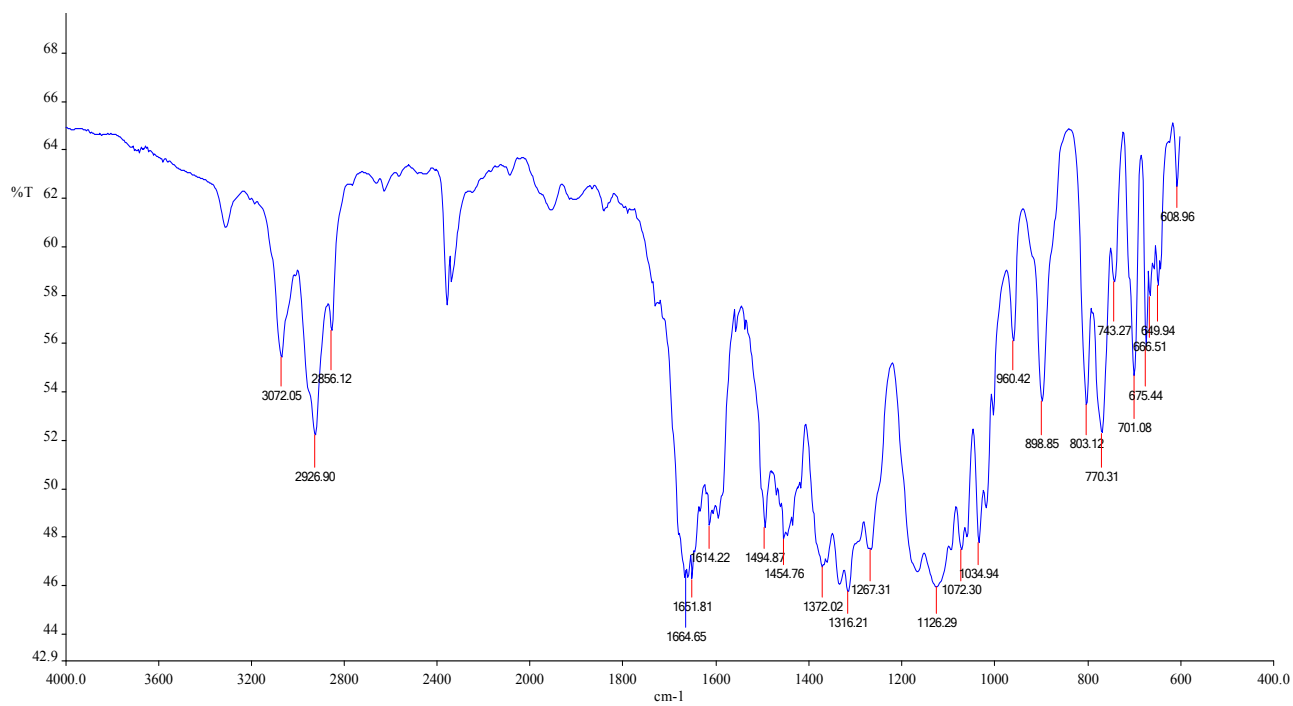

**(k) NM22:**

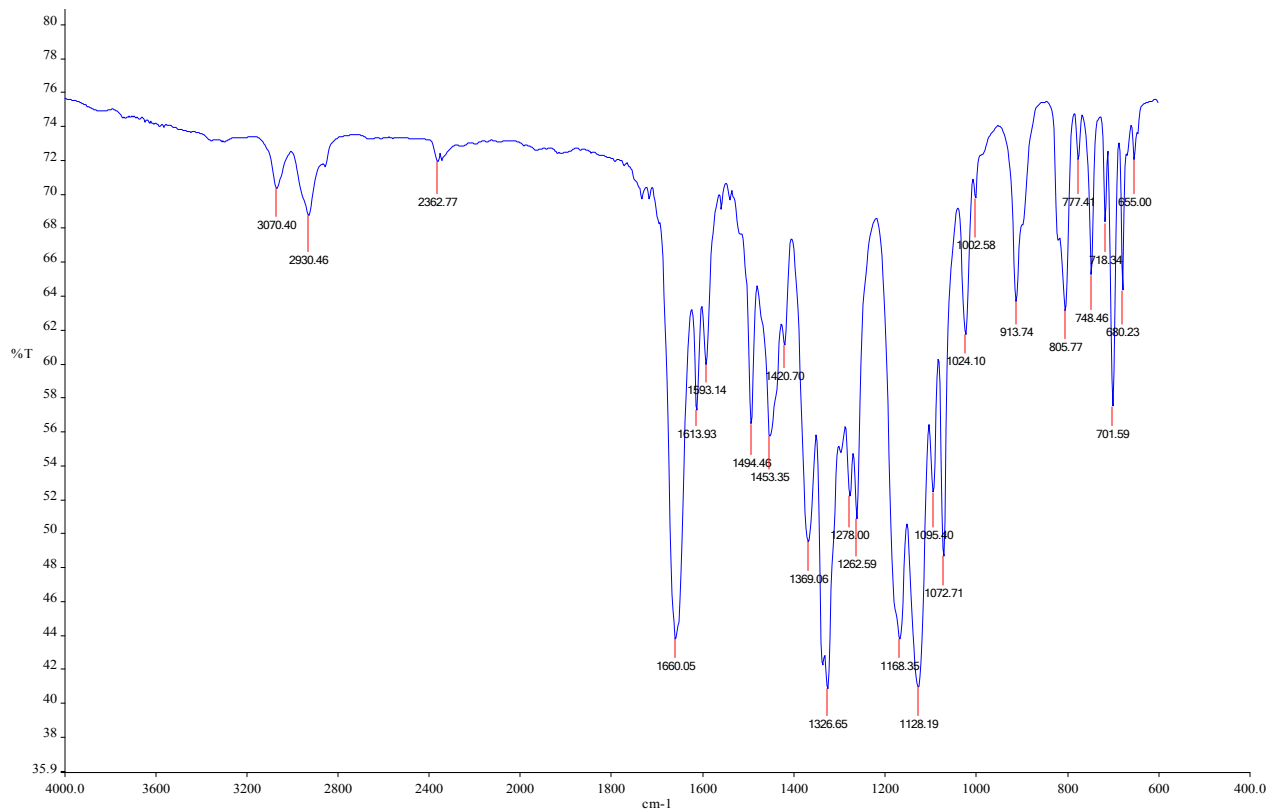

**(I) NM 23:**

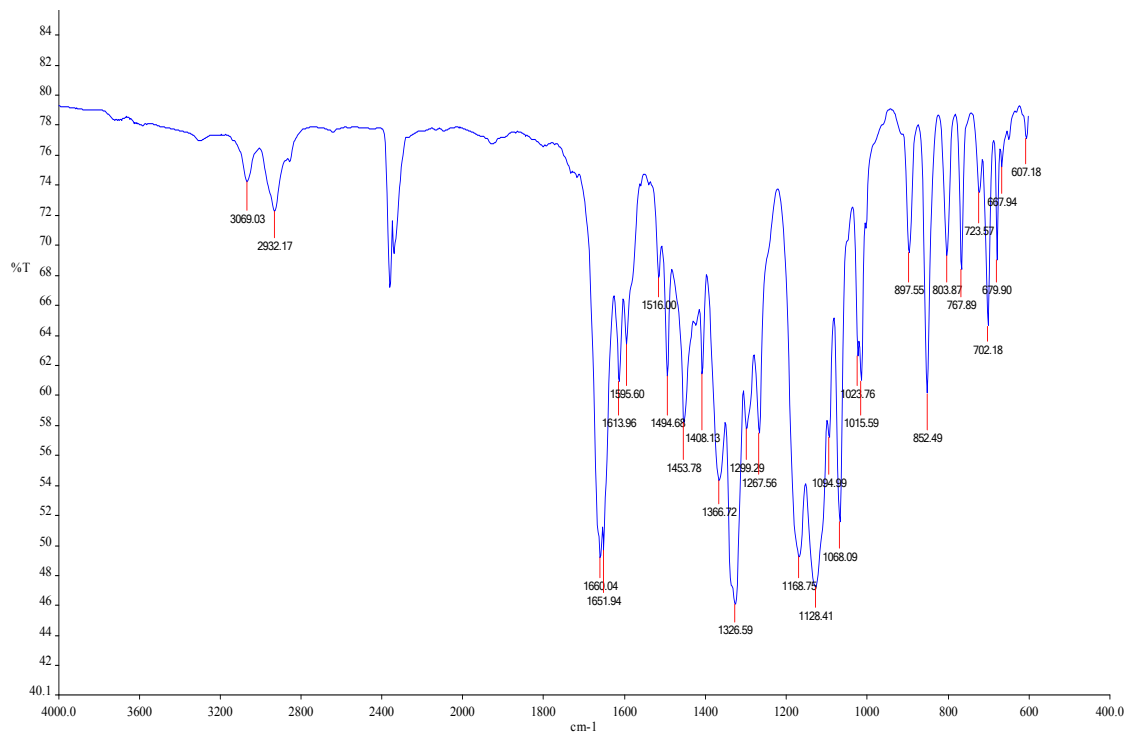

**(m) NM31:**

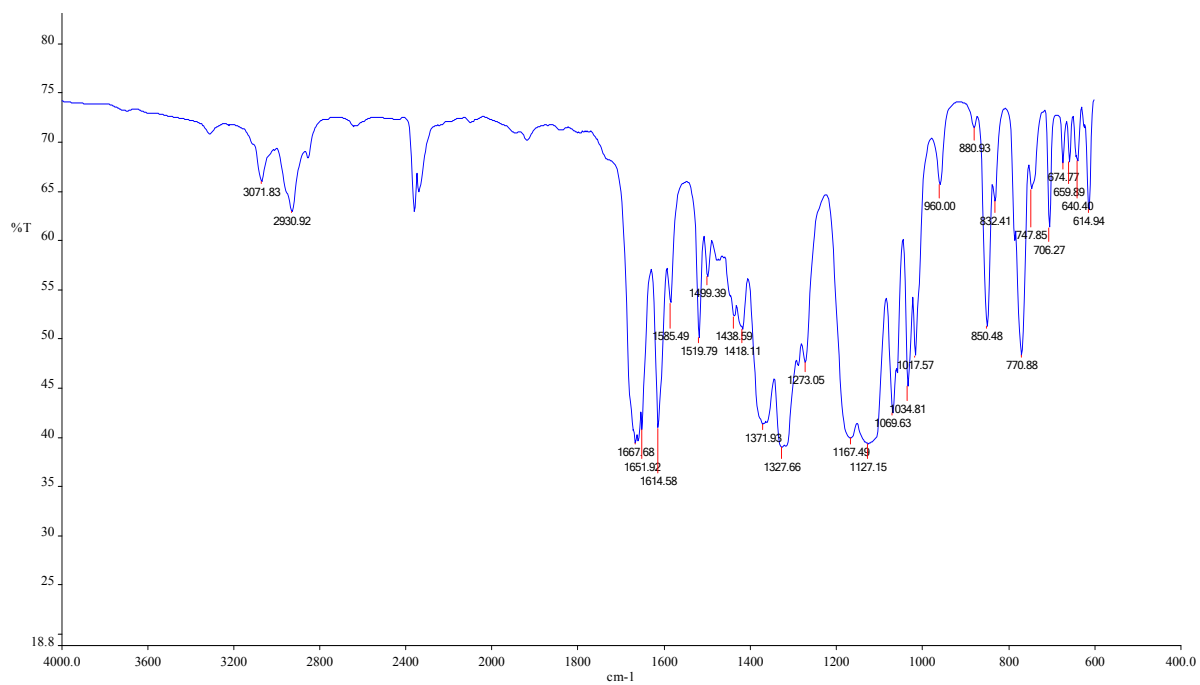

**(n) NM32:**

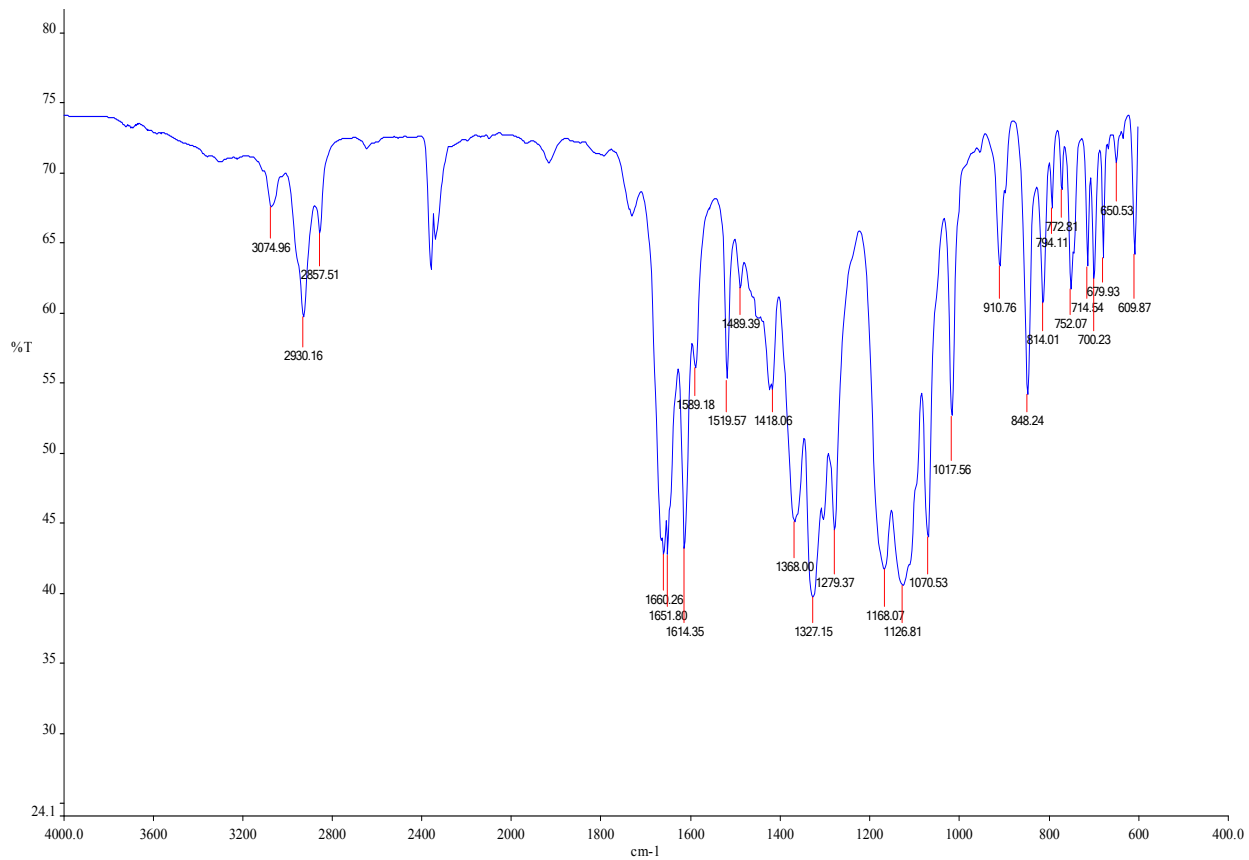

**(o) NM33:**

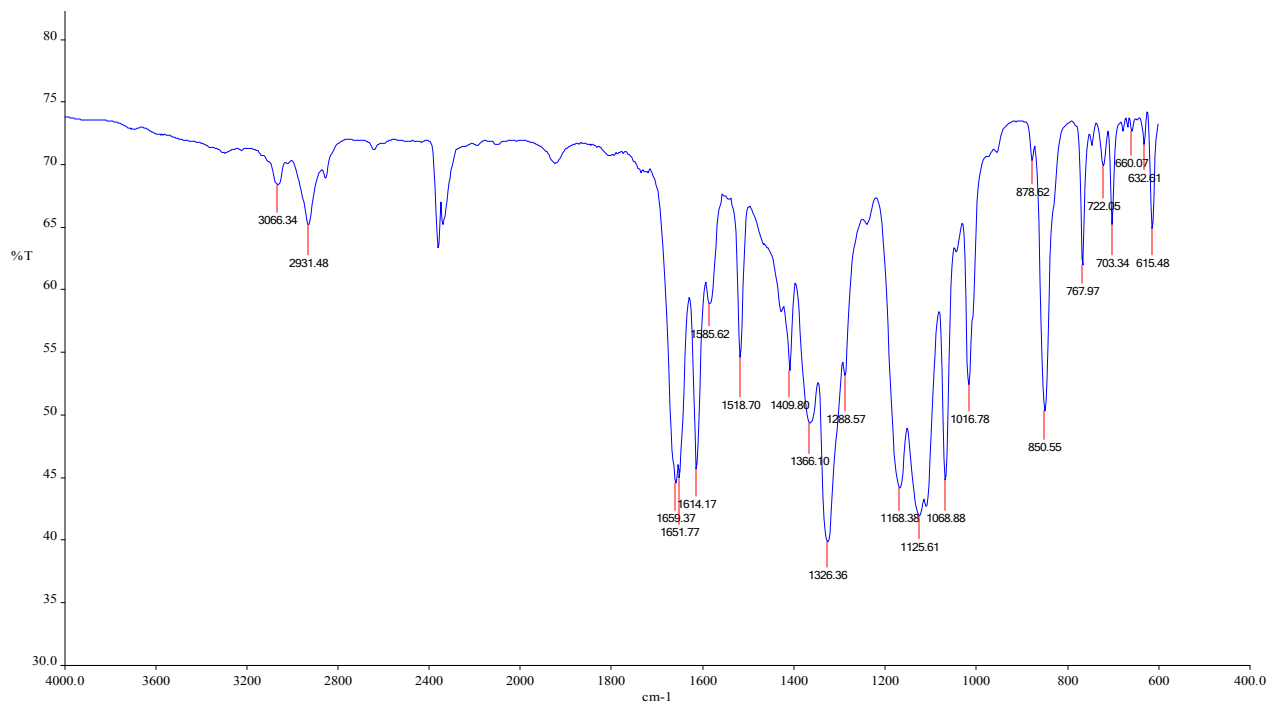

**Figure S2:  $^1\text{H}$ NMR of all compounds:** All NMR spectra were recorded on a 400MHz spectrometer (from Bruker) in  $\text{CDCl}_3$  as solvent.

**(a) NM01 (12 H):**  $\delta$  7.56 (d,  $J = 6.67\text{Hz}$ , 1H), 7.30 (m, 2H), 7.20 (t,  $J = 7.06\text{ Hz}$ , 2H), 7.11 (m, 4H), 3.53 (s, 3H).

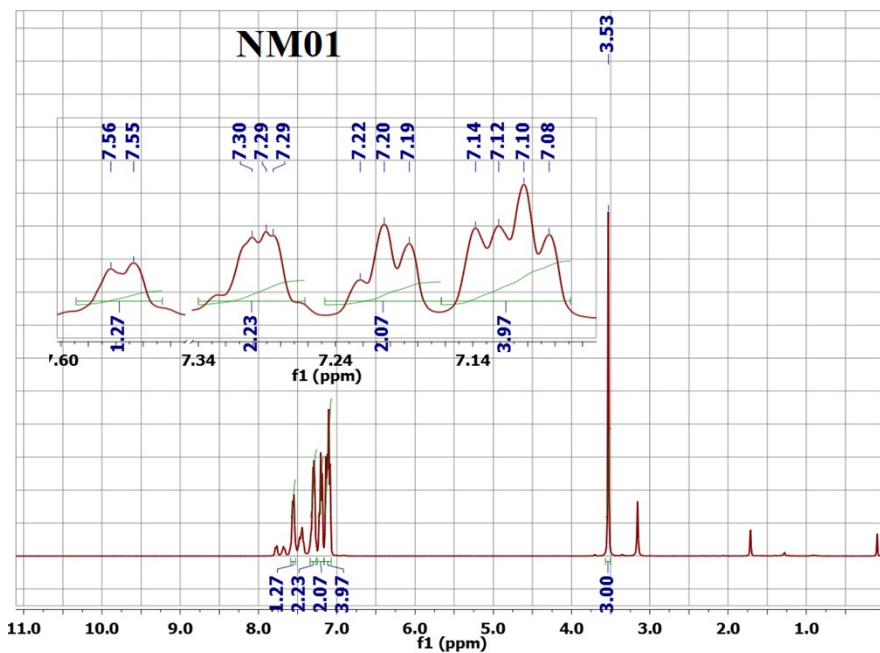

**(b) NM02 (12 H):**  $\delta$  7.58 (s, 1H), 7.49 (t,  $J = 7.43\text{ Hz}$ , 2H), 7.28 (m, 3H), 7.19 (tt,  $J = 7.43\text{ Hz}$ , 1.44 Hz, 1H), 7.05 (d,  $J = 7.43\text{ Hz}$ , 2H), 3.53 (s, 3H)

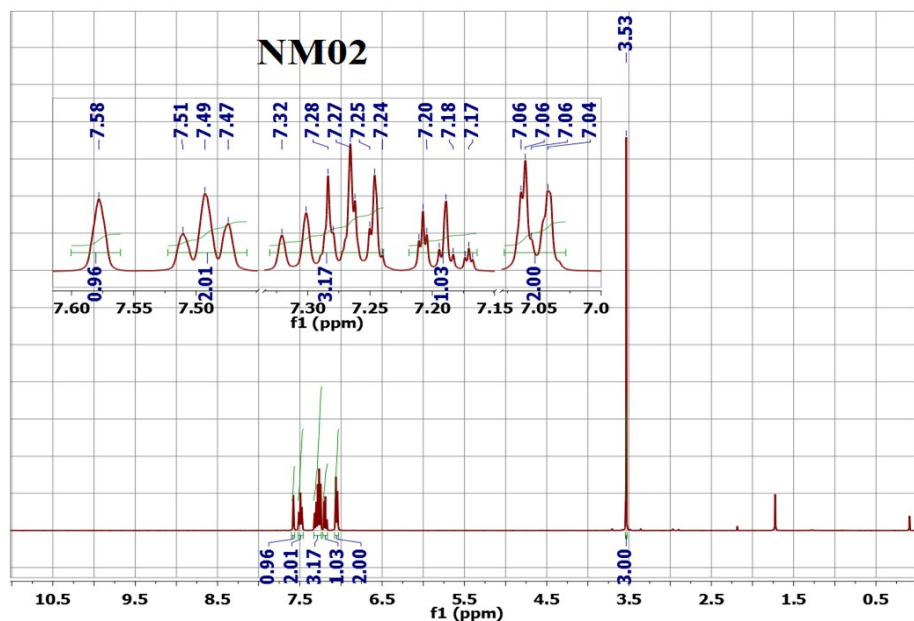

(c) **NM03** (12 H):  $\delta$  7.43 (td,  $J = 10.87$  Hz, 4.25Hz, 4H), 7.27 (tt,  $J = 7.26$  Hz, 1.70 Hz, 2H), 7.19 (tt,  $J = 7.35$ Hz, 1.43 Hz, 1H), 7.05 (d,  $J = 7.35$  Hz, 2H), 3.53 (s, 3H)

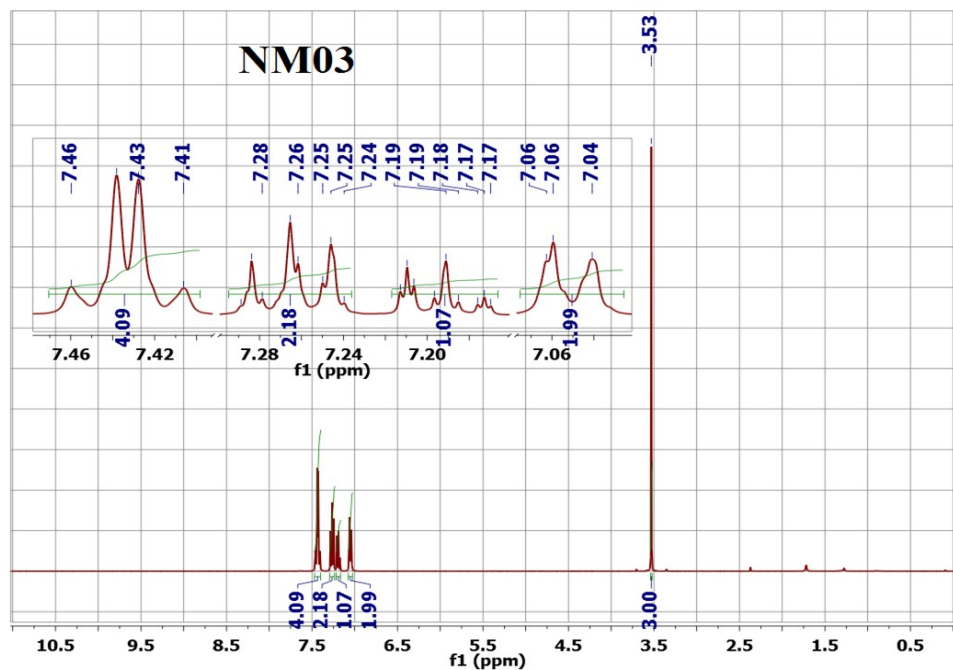

(d) **NM10** (12 H):  $\delta$  7.65 (d,  $J = 7.44$  Hz, 2H), 7.45 (m, 3H), 7.36 (t,  $J = 7.44$  Hz, 1H), 7.21 (d,  $J = 6.65$  Hz, 1H), 7.16 (d,  $J = 7.00$  Hz, 2H), 3.45 (s, 3H)

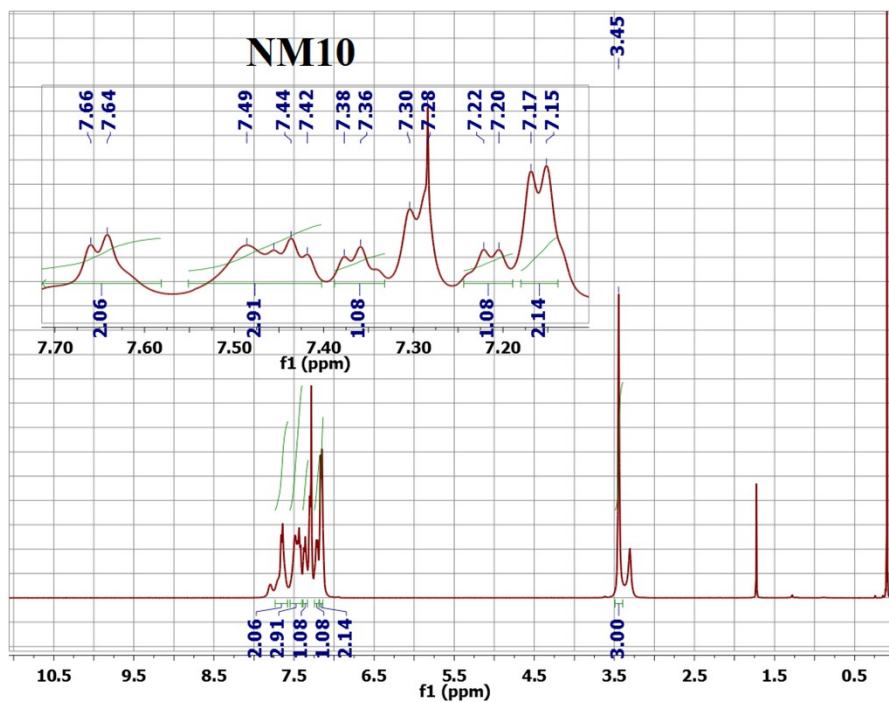

(e) **NM20** (12 H):  $\delta$  7.41 (d,  $J = 7.76$  Hz, 1H), 7.35 (m, 2H), 7.29 (m, 3H), 7.22 (d,  $J = 7.42$ , 3H), 3.54 (s, 3H).

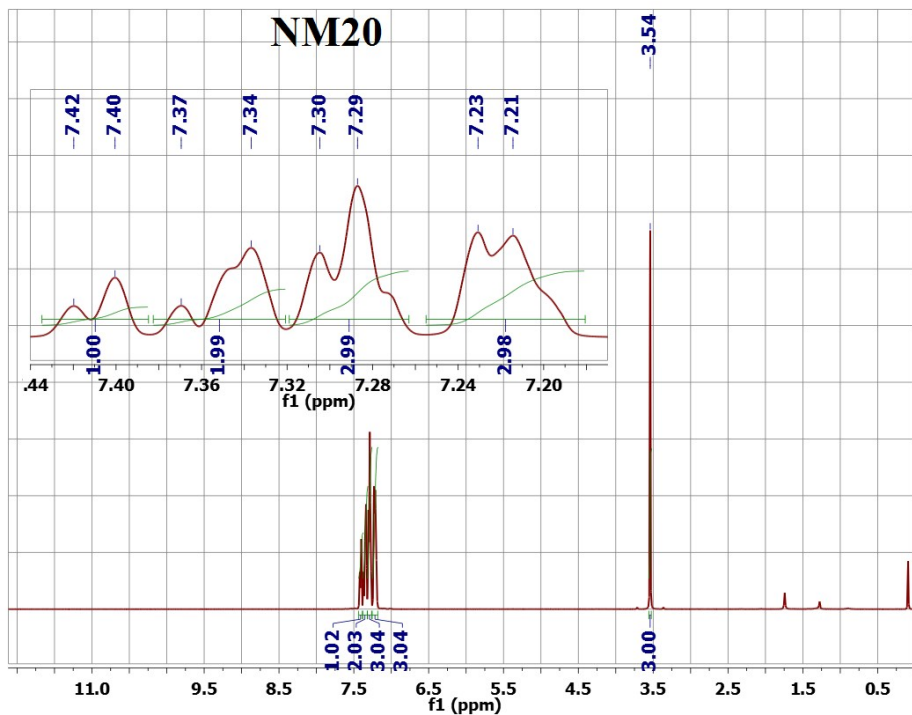

(f) **NM30** (12 H): 7.51 (d,  $J = 8.29$  Hz, 2H), 7.31 (m, 3H), 7.23 (m, 2H), 7.17 (d,  $J = 8.29$  Hz, 2H), 3.54 (s, 3H).

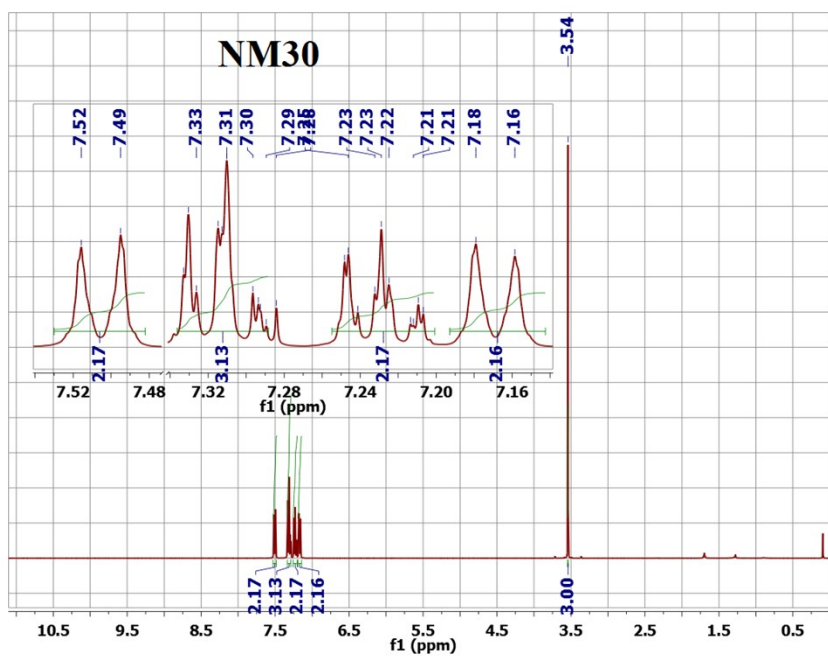



(g) **NM11** (11 H):  $\delta$  7.81 (d,  $J = 7.95\text{Hz}$ , 1H), 7.78 (d,  $J = 7.95\text{Hz}$ , 1H), 7.70 (qn,  $J = 9.00\text{Hz}$ , 2H), 7.60 (d,  $J = 7.73\text{ Hz}$ ,1H), 7.55 (q,  $J = 7.45$ , 2H), 7.45 (d,  $J = 7.73\text{Hz}$ , 1H), 3.11 (s, 3H).

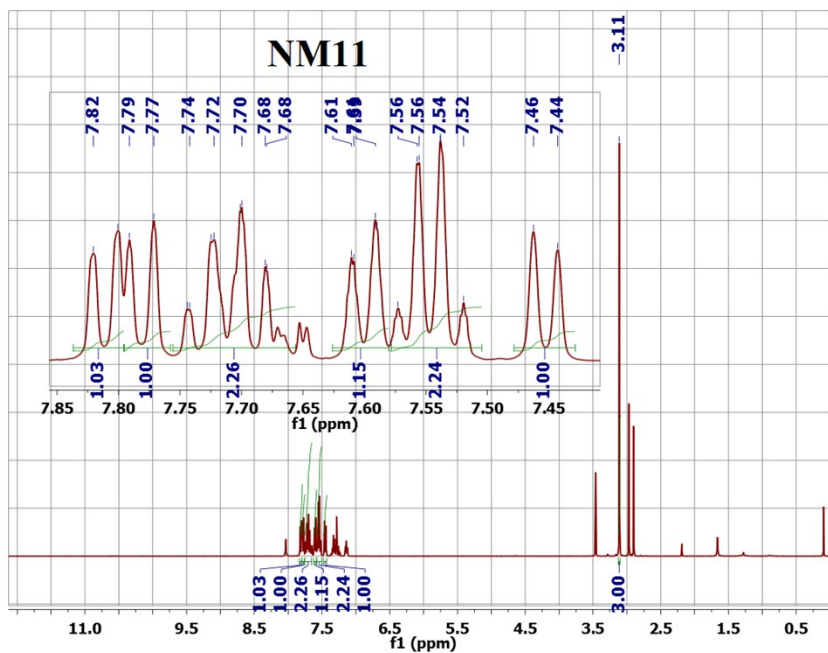

(h) **NM12** (11 H):  $\delta$  7.66 (d,  $J = 7.70\text{ Hz}$ , 1H), 7.54 (s, 1H), 7.49 (t,  $J = 6.80\text{ Hz}$ , 3H), 7.41 (t,  $J = 7.43\text{ Hz}$ , 1H), 7.30 (t,  $J = 7.42\text{ Hz}$ , 1H), 7.22 (d,  $J = 7.77\text{ Hz}$ , 1H), 3.47 (s, 3H).

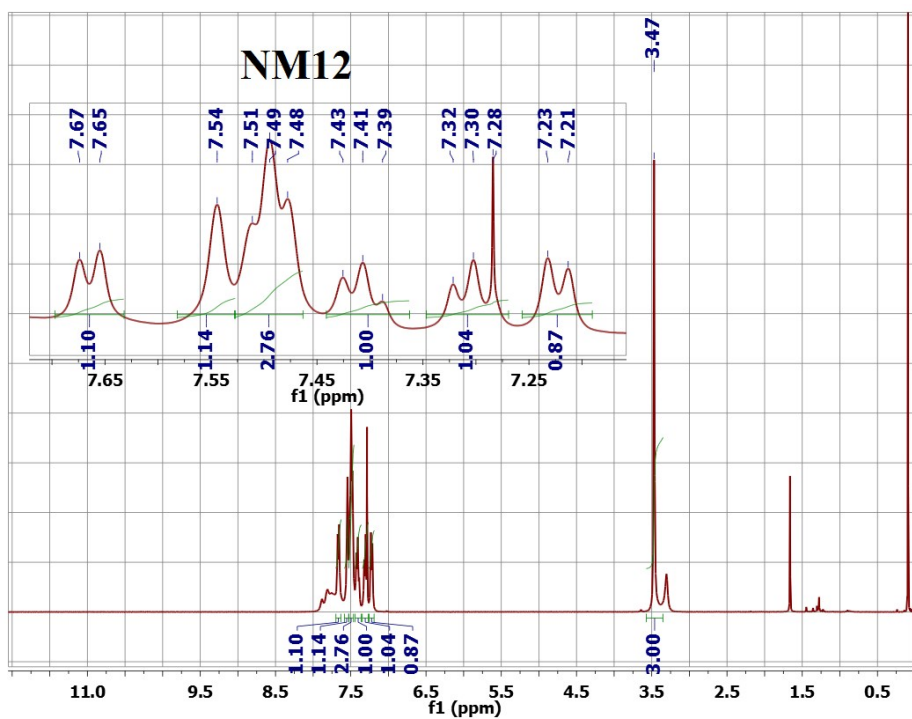

- (i) **NM13** (11 H):  $\delta$  7.48 (m, 3H), 7.40 (t,  $J = 7.73$  Hz, 3H), 7.36 (d,  $J = 7.72$  Hz, 1H), 7.21 (d,  $J = 7.72$  Hz, 1H), 3.55 (s, 3H).

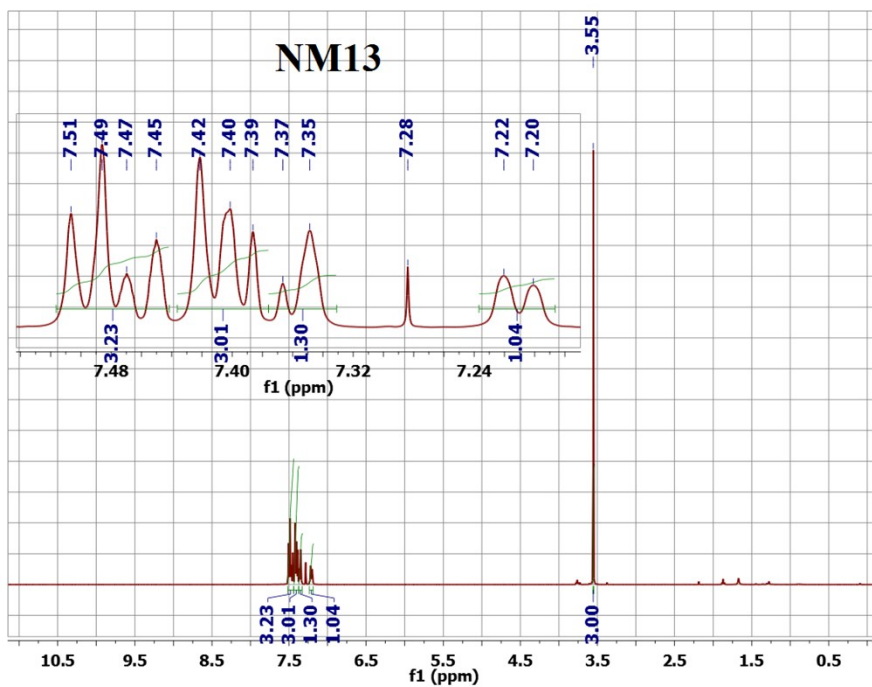

- (j) **NM21** (11H):  $\delta$  7.68 (s, 1H), 7.57 (m, 2H), 7.34 (m, 4H), 7.15 (s, 1H), 3.56 (s, 3H)

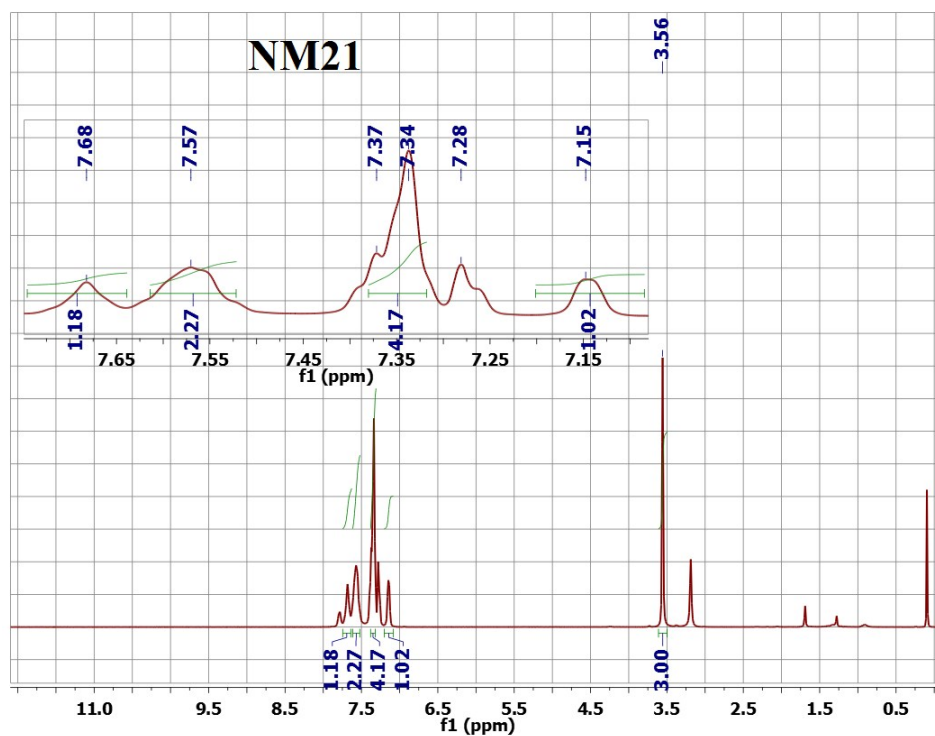

(k) **NM22** (11H):  $\delta$  7.55 (d,  $J = 8.42$  Hz, 2H), 7.48 (t,  $J = 9.05$  Hz, 2H), 7.38 (m, 3H), 7.23 (d,  $J = 7.96$  Hz, 1H), 3.56 (s, 3H).

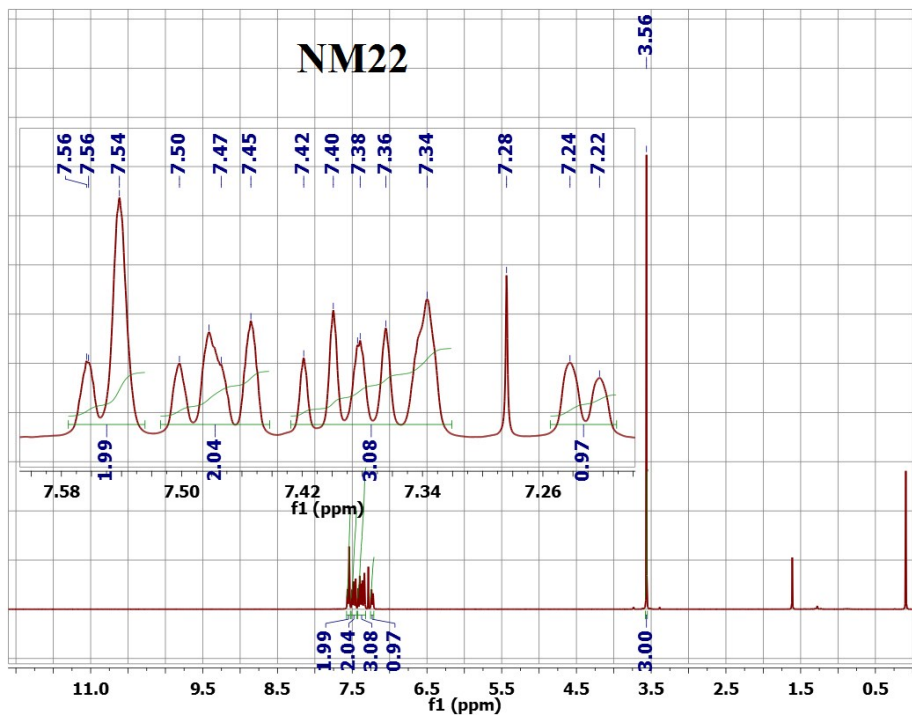

(l) **NM23** (11H):  $\delta$  7.48 (m, 3H), 7.40 (t,  $J = 7.01$  Hz, 3H), 7.36 (d,  $J = 7.43$  Hz, 1H), 7.21 (d,  $J = 7.85$  Hz, 1H), 3.55 (s, 3H).

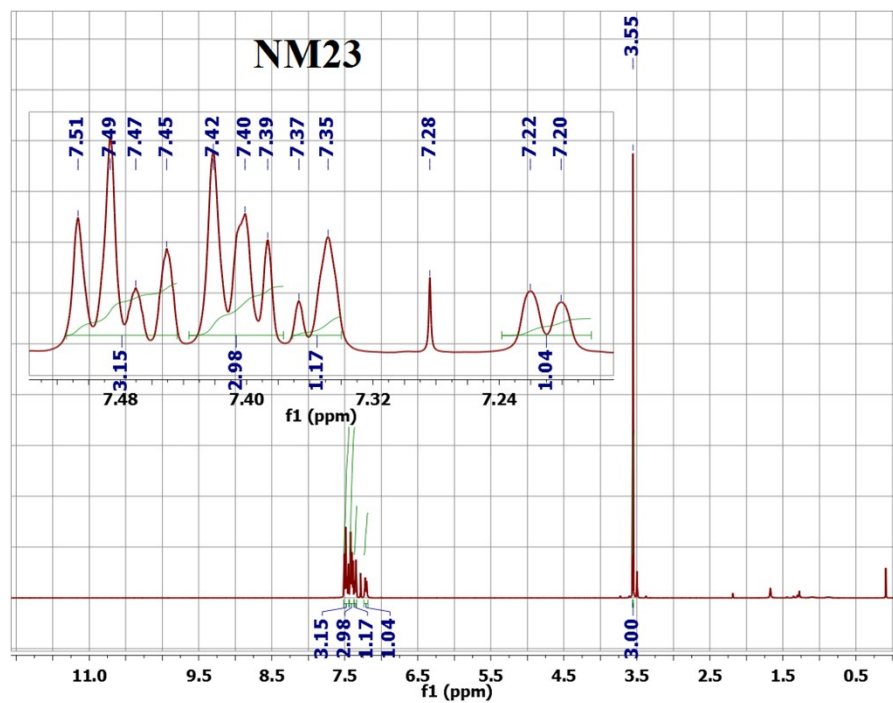

(m) **NM31** (11H):  $\delta$  7.61 (d,  $J = 7.84\text{Hz}$ , 2H), 7.48 (d,  $J = 6.90\text{Hz}$ , 2H), 7.36 (t,  $J = 6.93\text{Hz}$ , 2H), 7.20 (d,  $J = 6.90\text{Hz}$ , 2H), 3.56 (s, 3H).

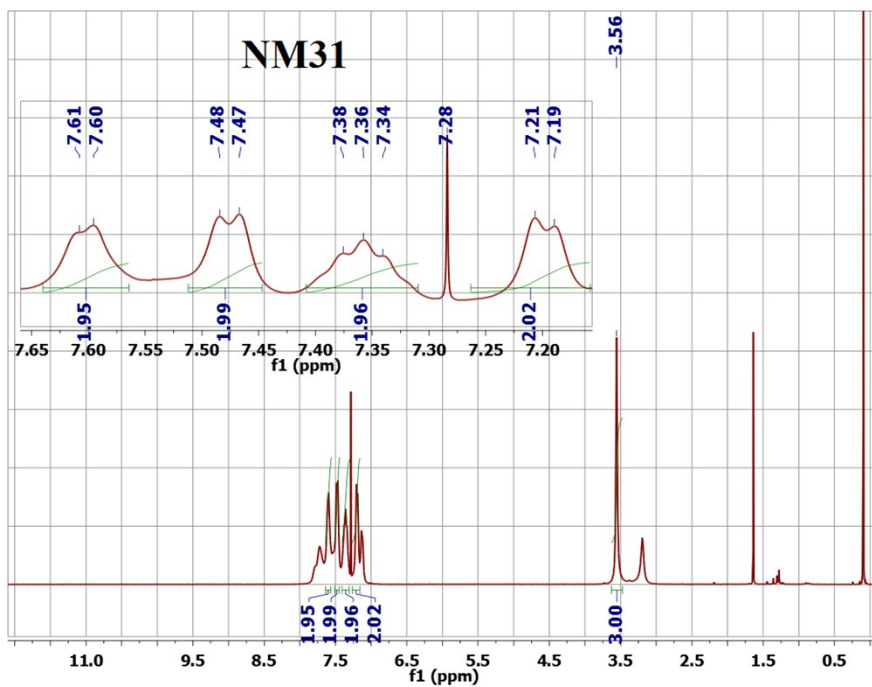

(n) **NM32** (11H):  $\delta$  7.59 (s, 1H), 7.55 (t,  $J = 9.11\text{Hz}$ , 3H), 7.48 (d,  $J = 7.56\text{Hz}$ , 1H), 7.36 (t,  $J = 7.83\text{Hz}$ , 1H), 7.18 (d,  $J = 7.90\text{Hz}$ , 2H), 3.56 (s, 3H).

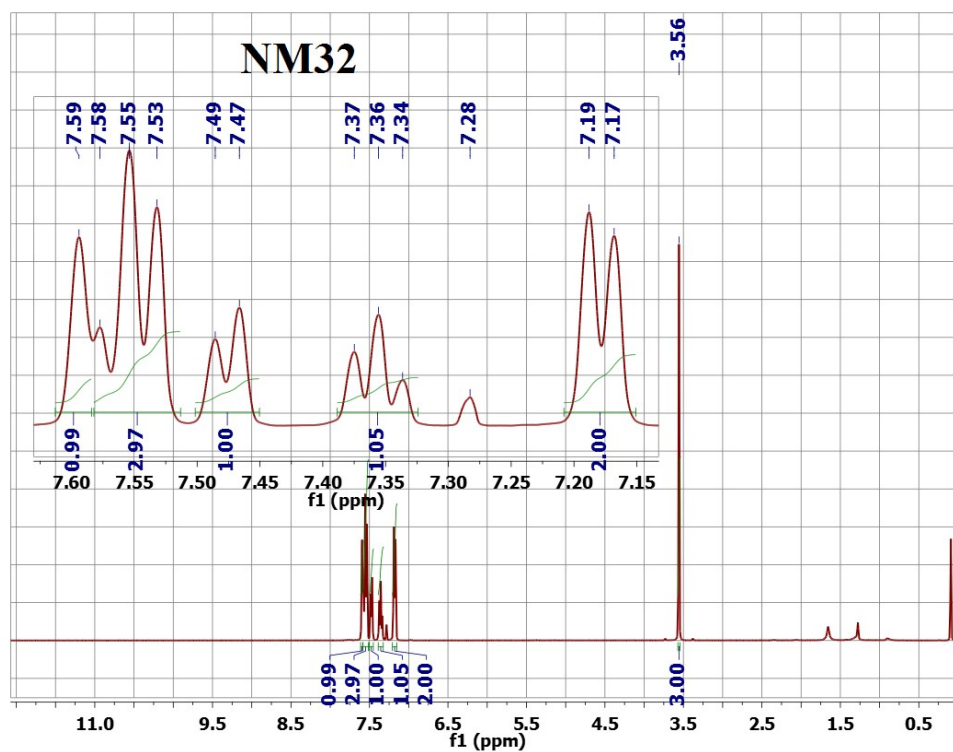

(o) **NM33** (11H):  $\delta$  7.54 (t,  $J = 7.65$  Hz, 3H), 7.50 (s, 1H), 7.44 (d,  $J = 8.31$  Hz, 2H), 7.18 (d,  $J = 8.02$  Hz, 2H), 3.55 (s, 3H).

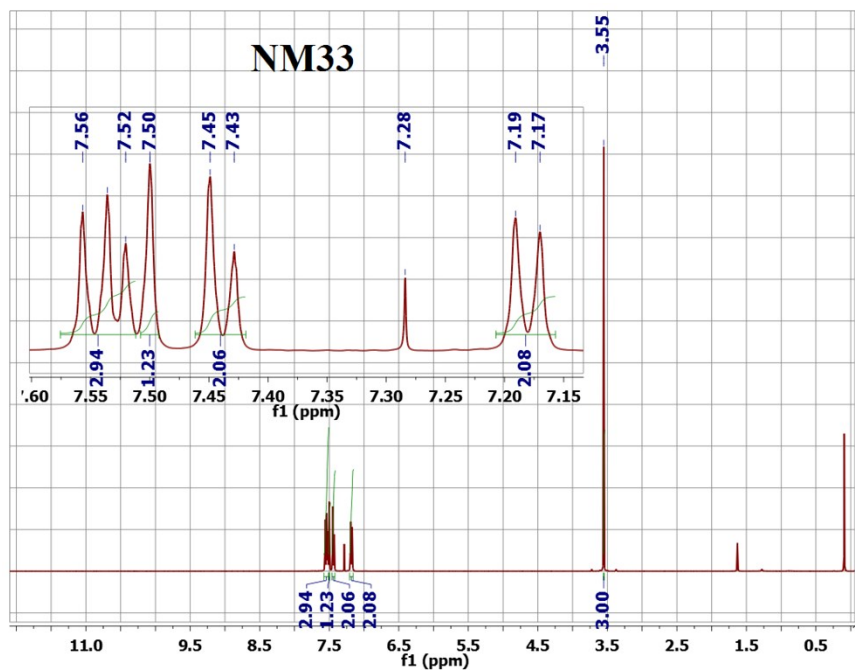

Figure S3: DSC curves of solids (@ 5°C/min) recorded on Perkin Elmer DSC 6000.

(a) **NM02**

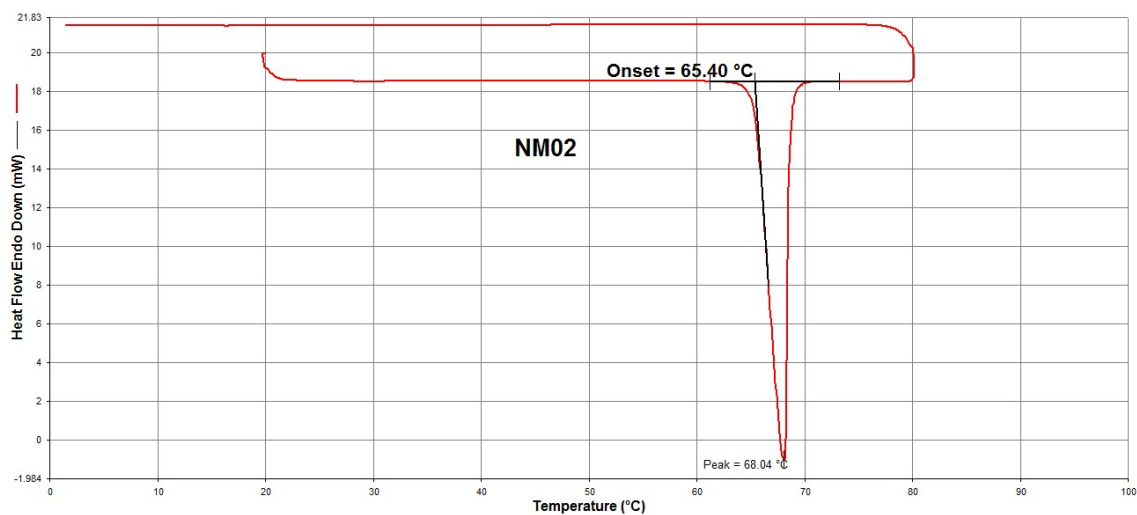

(b) **NM03:**

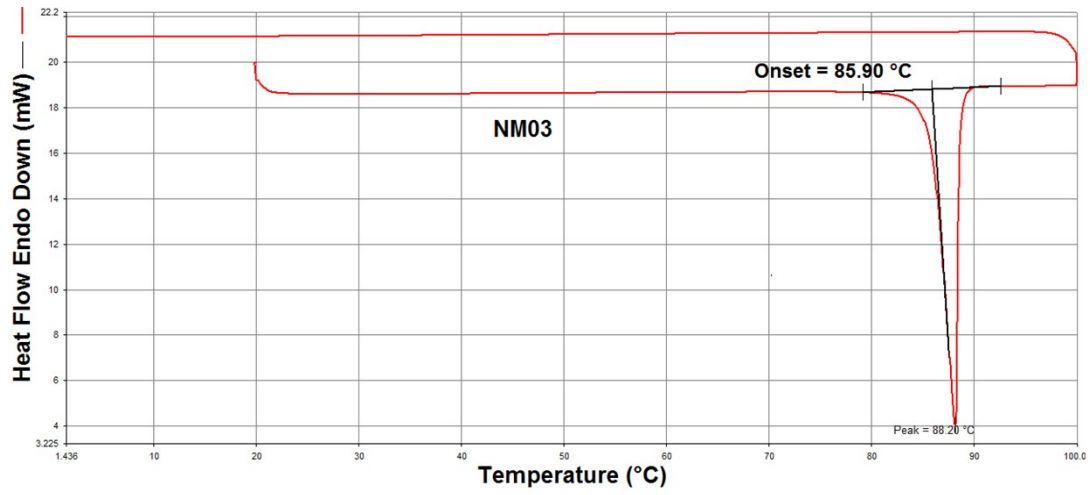

(c) NM10:

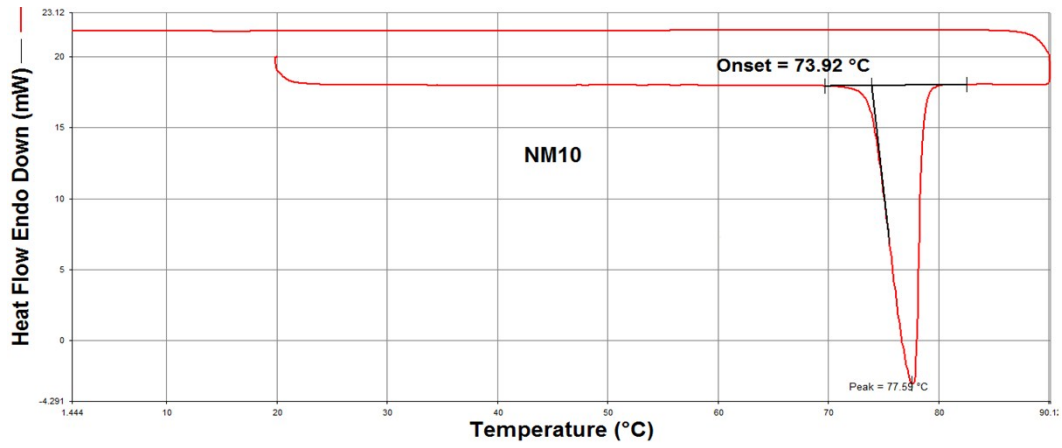

(d) NM30:

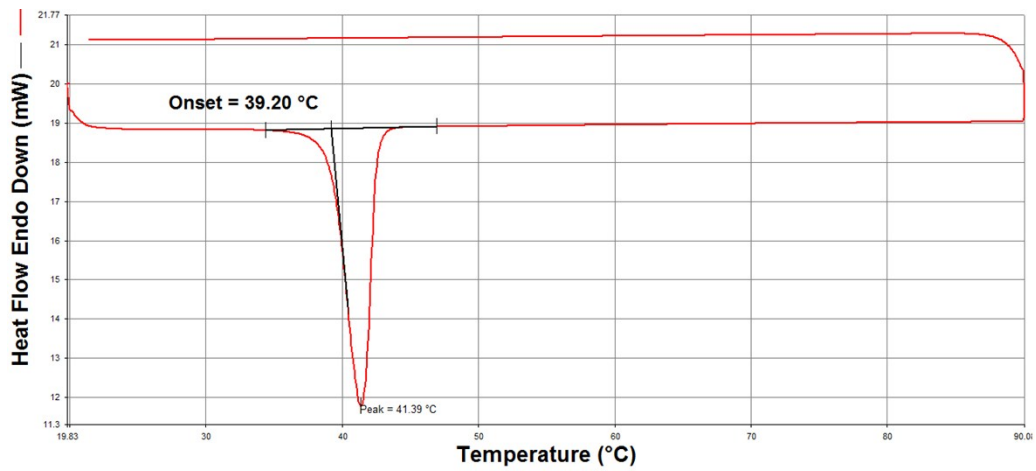

(e) NM11:

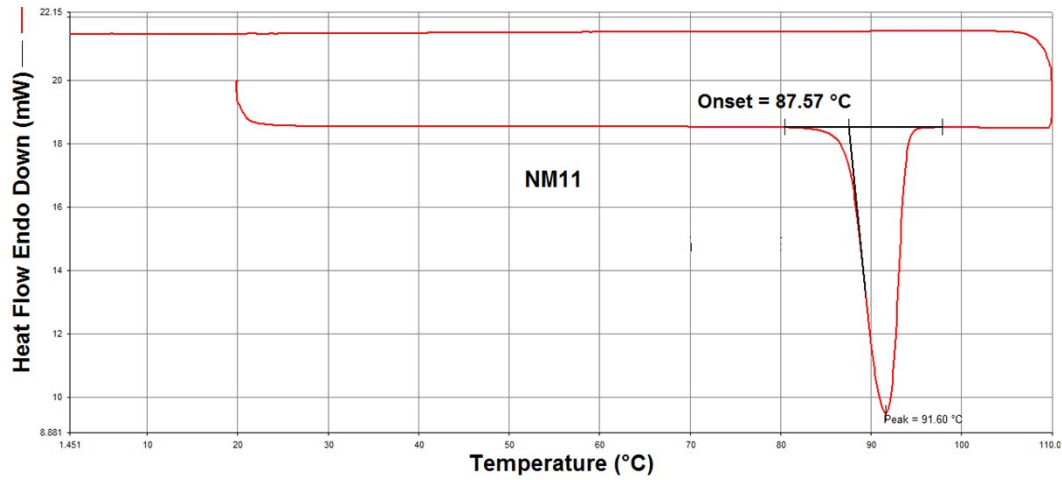

(f) NM12:

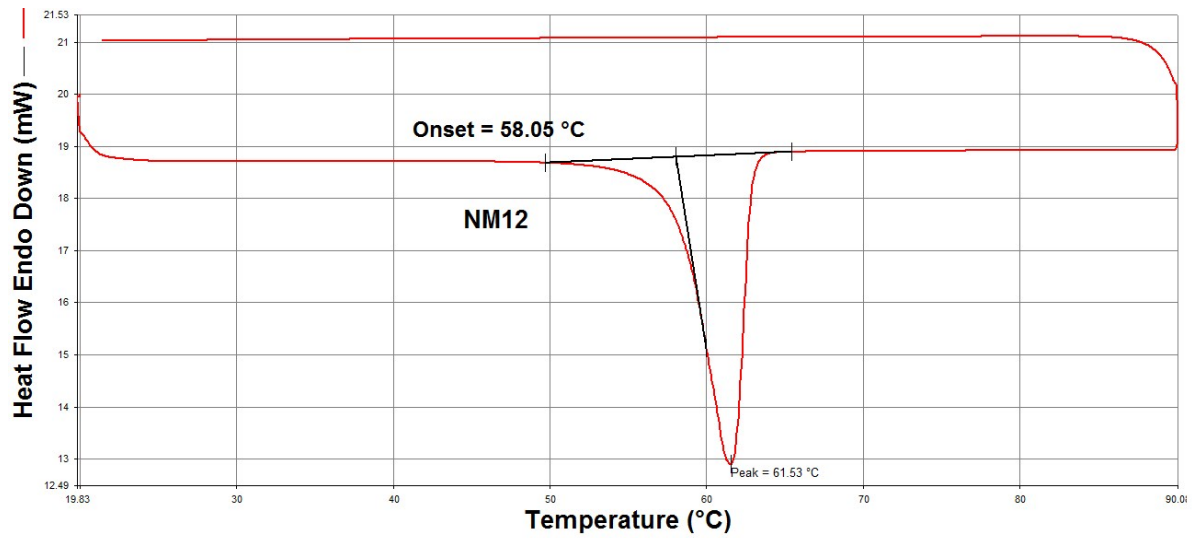

(g) NM22:

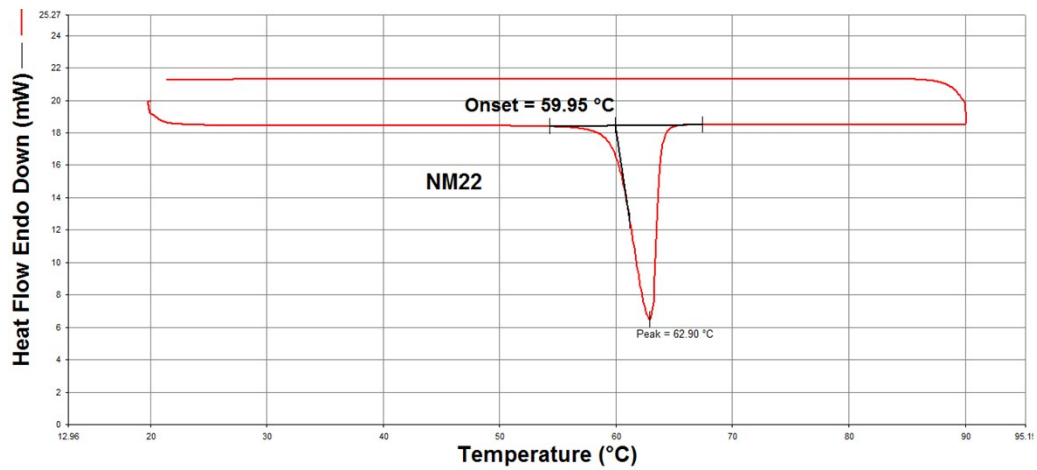

(h) NM23:

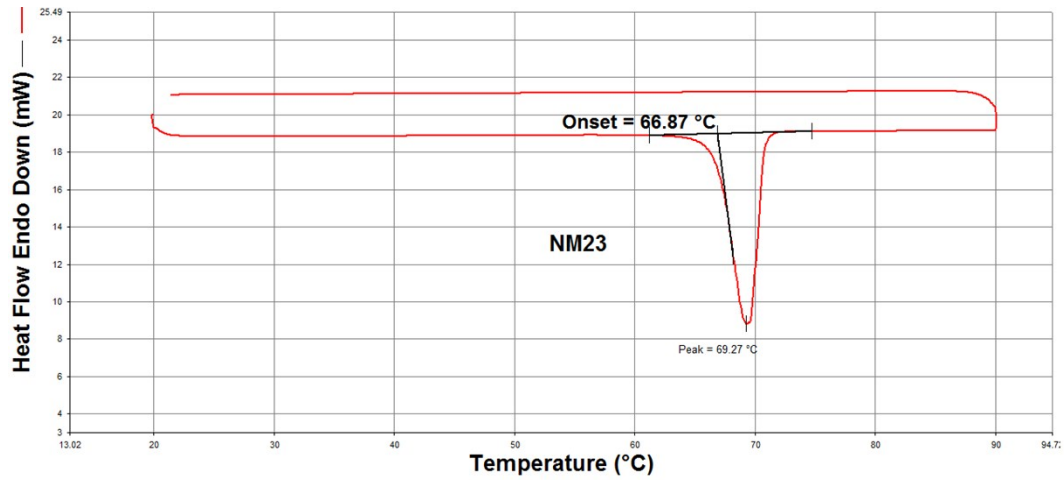

(i) NM31:

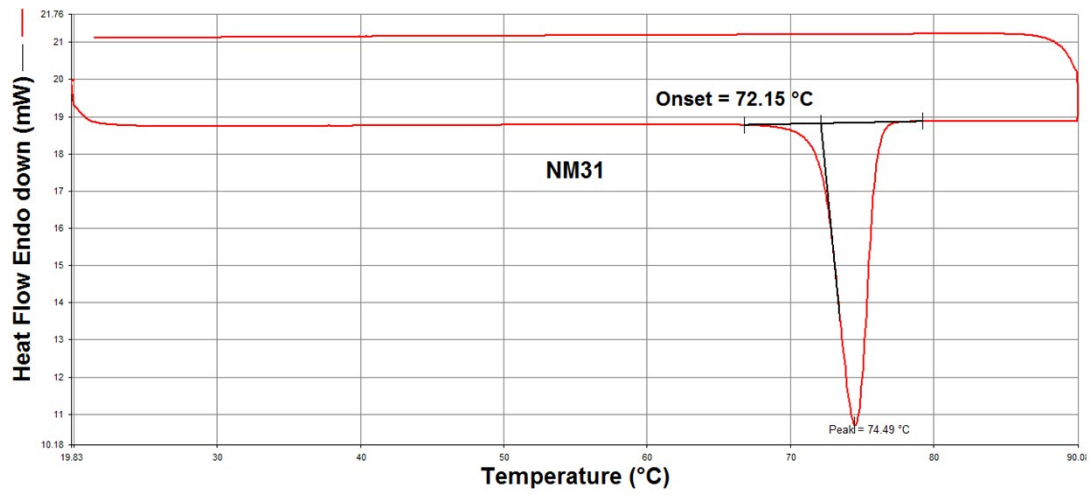

(j) NM33:

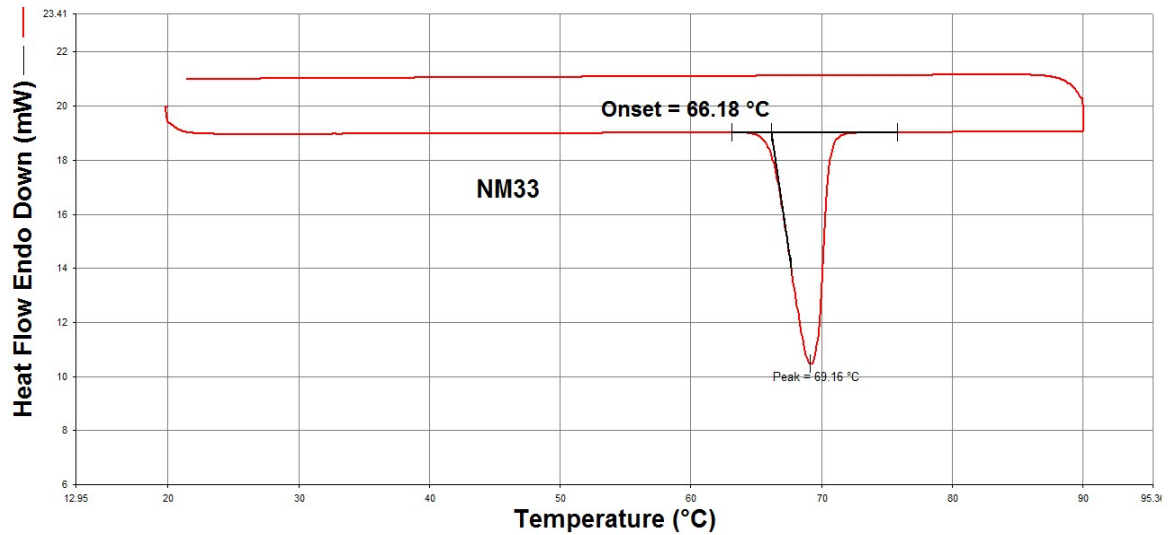



**Figure S4: Experimental powder pattern for all solid compounds and its comparison with the simulated powder pattern.**

**(a) NM02:**

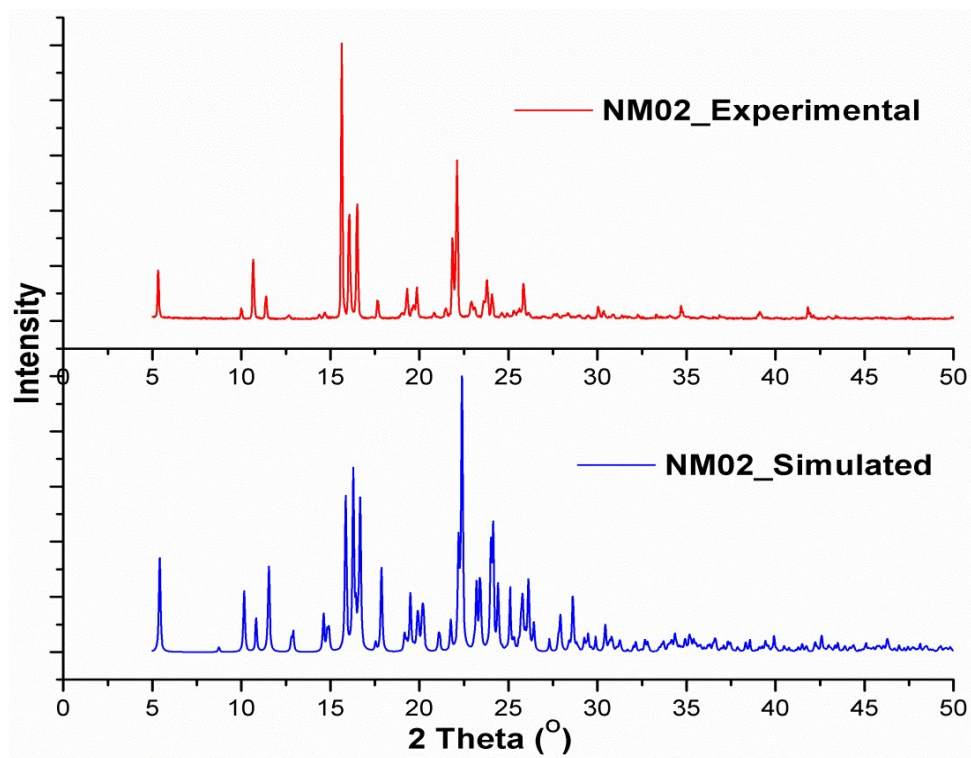

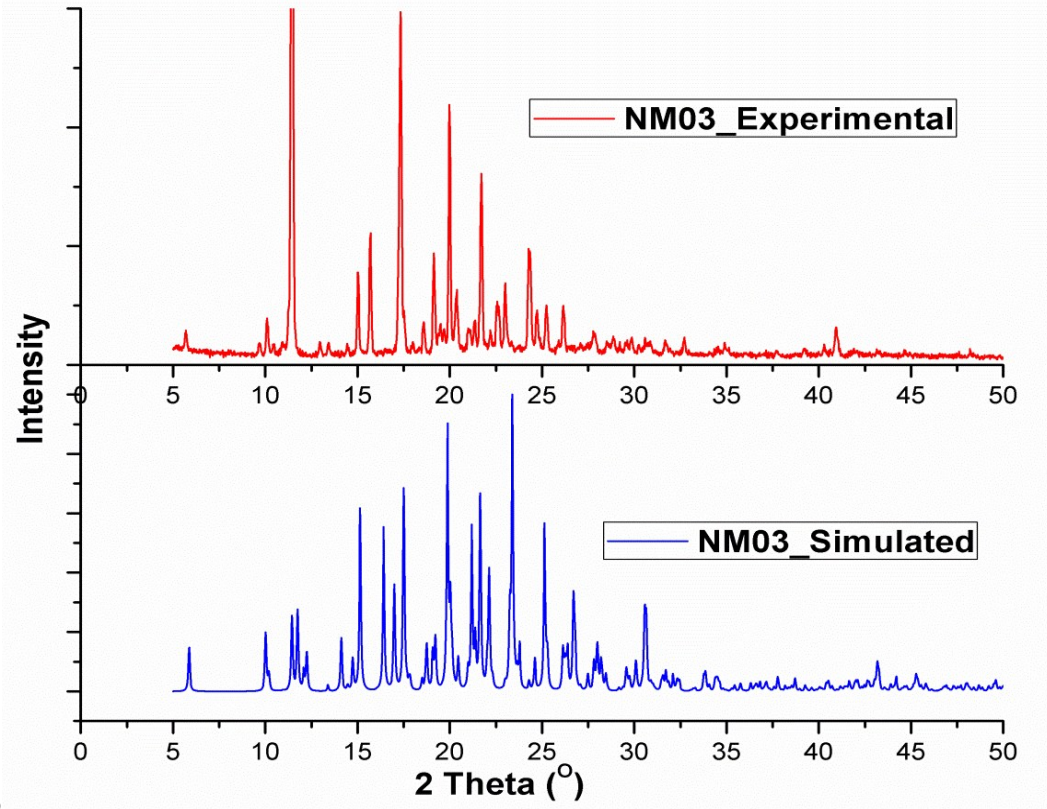

(b) NM03

(c) NM10:

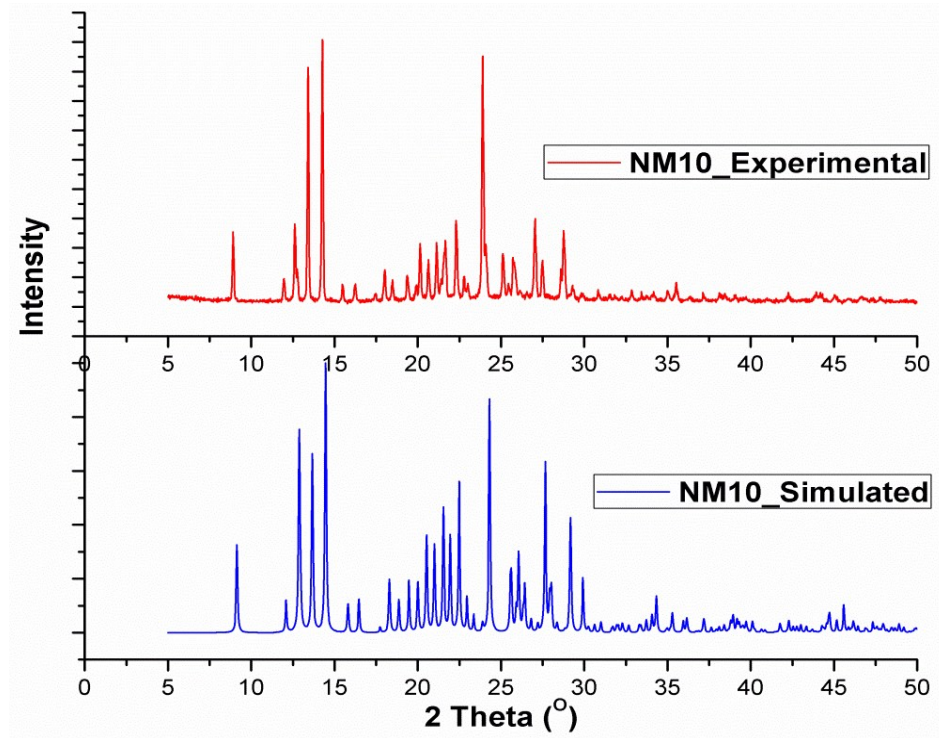

(d) NM30:

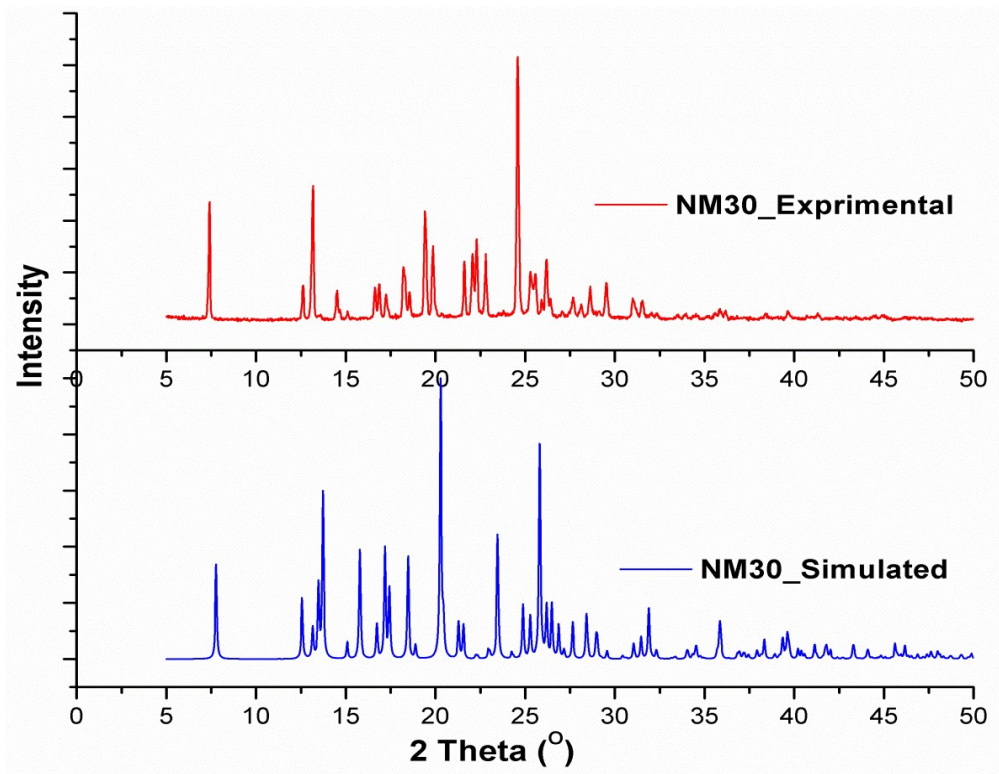

(e) NM11:

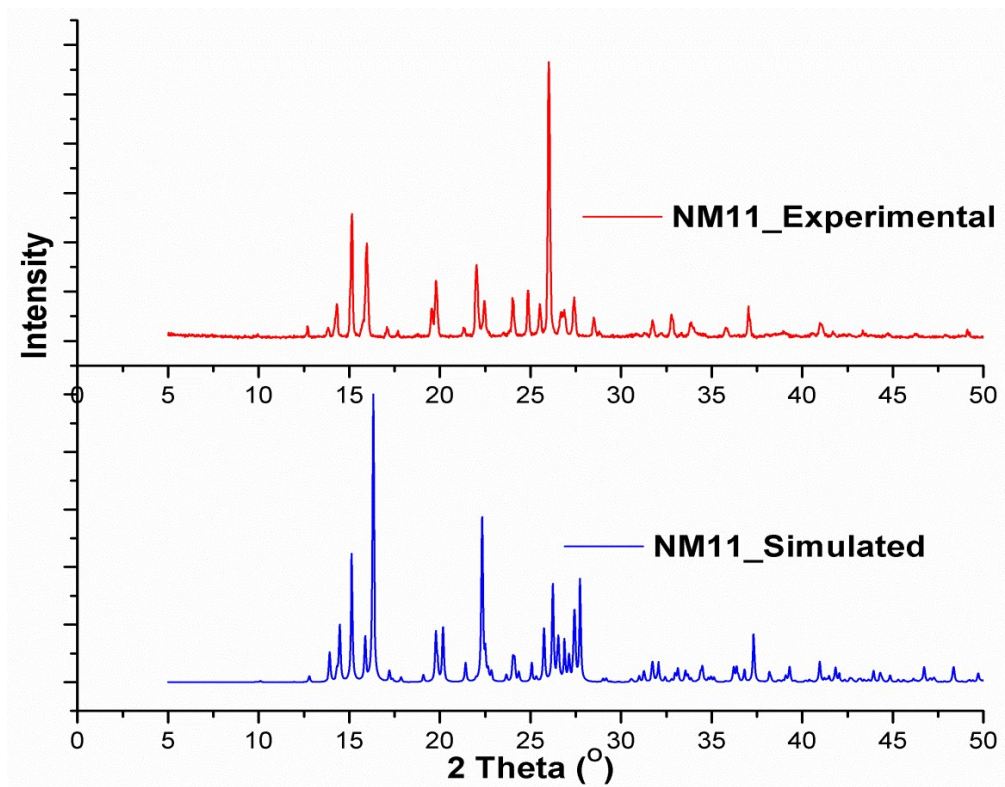

(f) NM12:

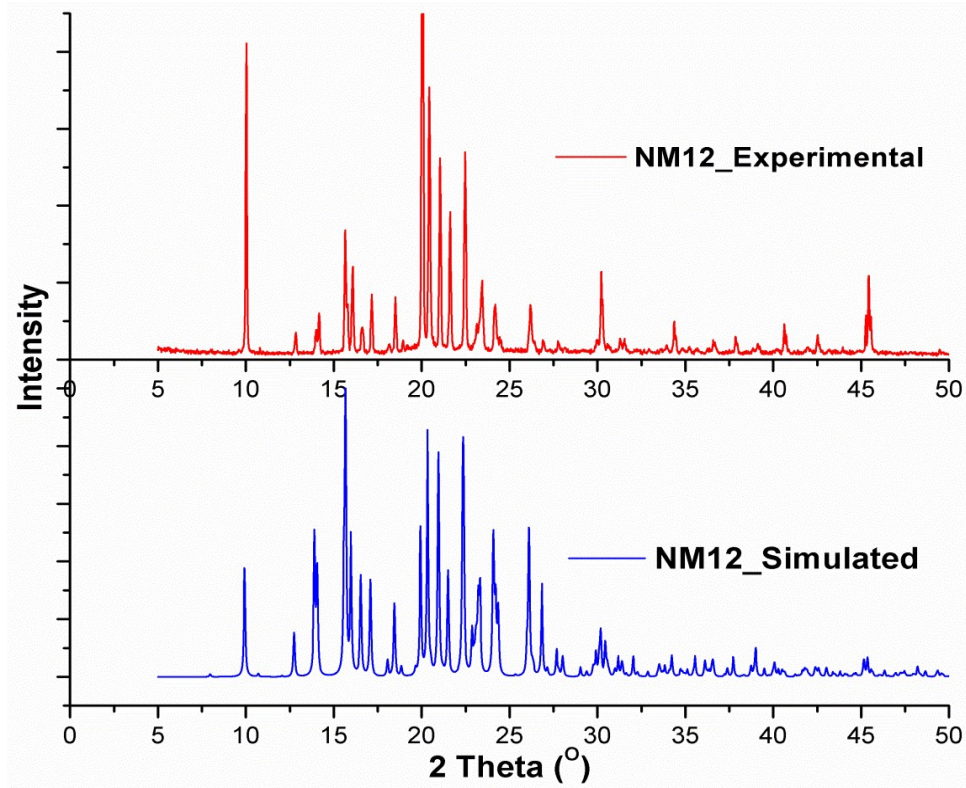

(g) NM22:

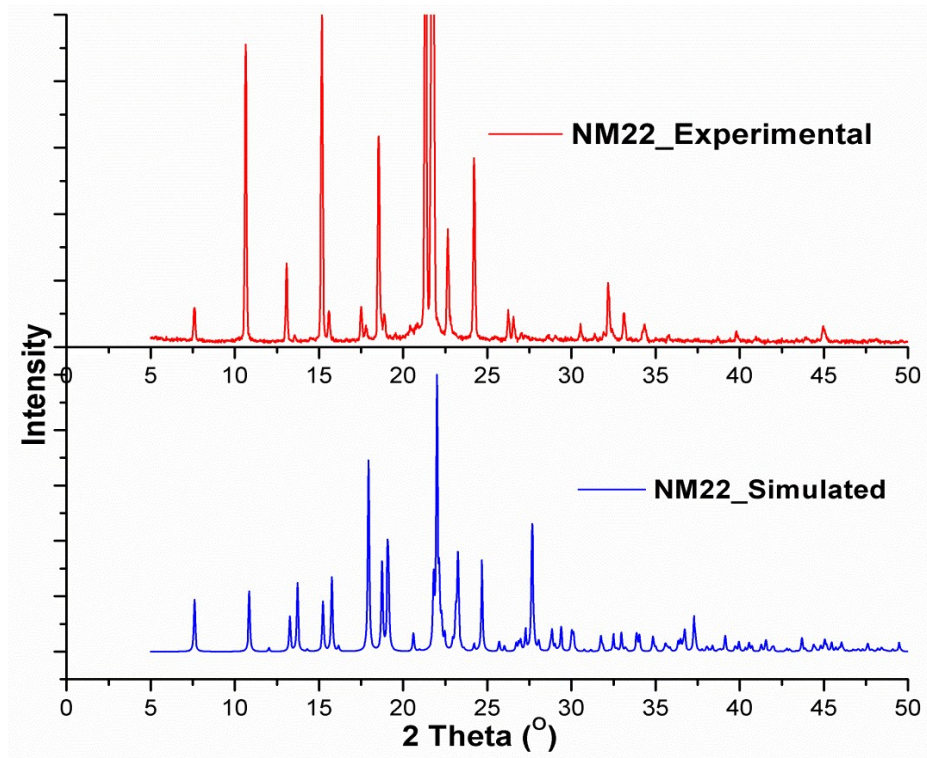

(h) NM23:

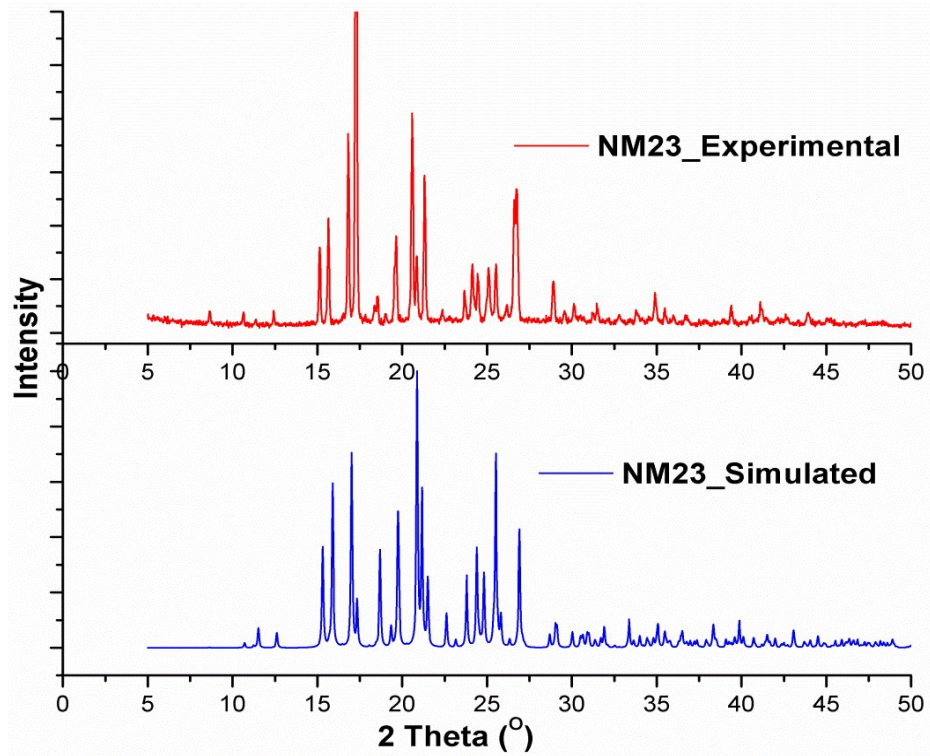

(i) NM31:

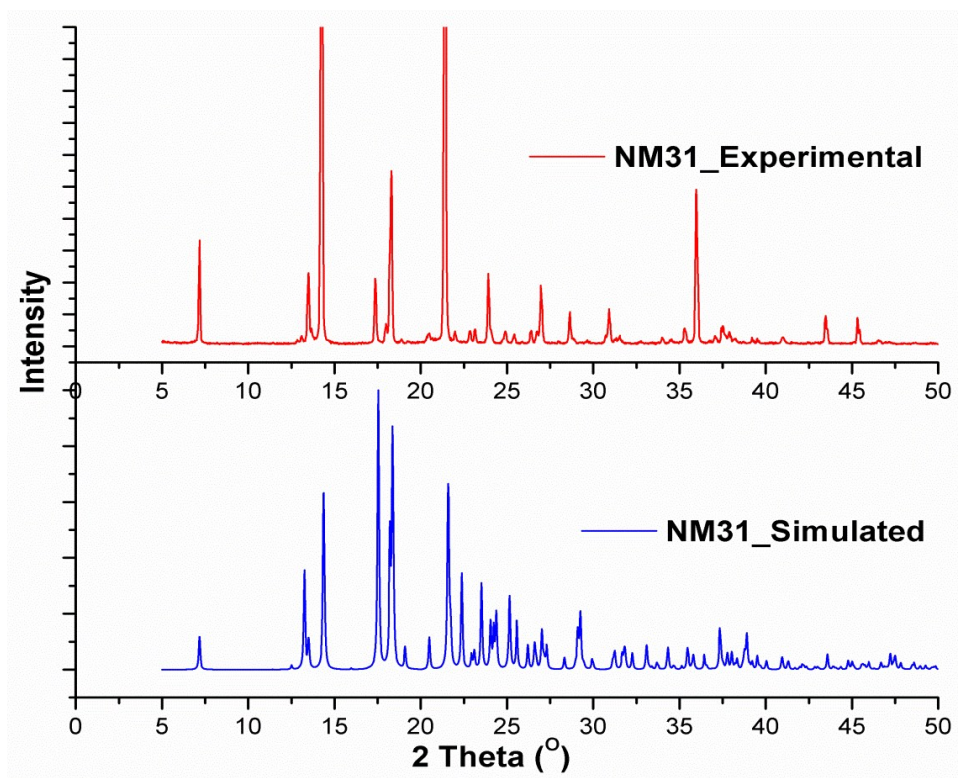

(j) NM33:

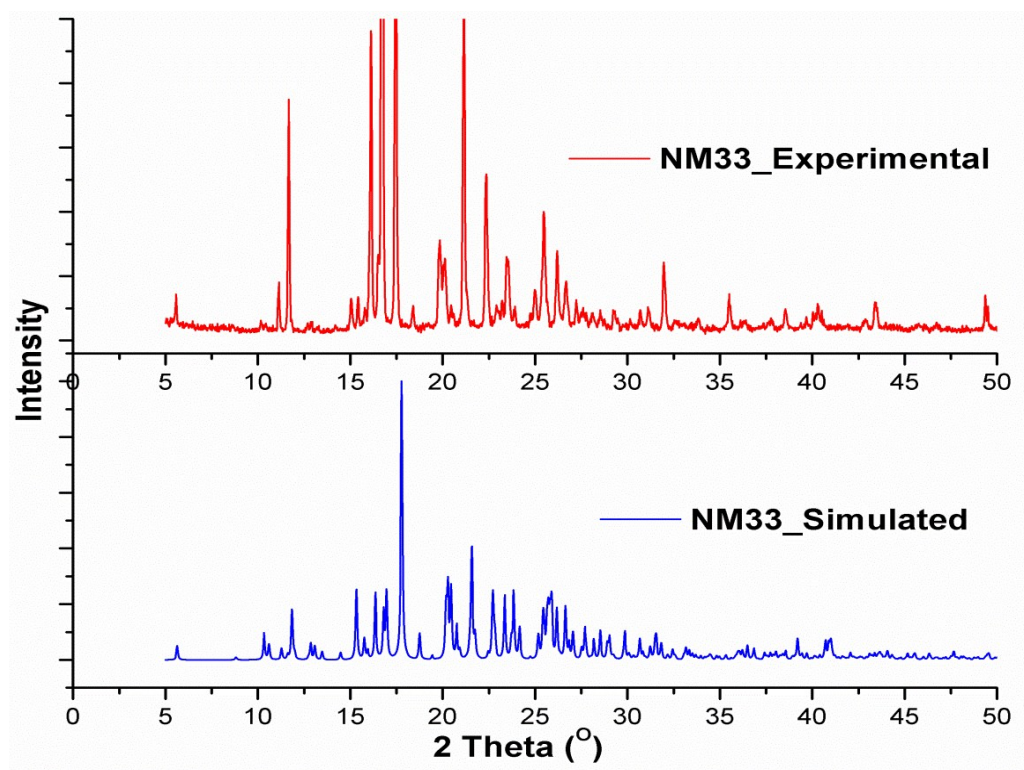

**Figure S5:** *ORTEP* of all compounds drawn with 50% ellipsoidal probability with atom-numbering scheme. Only the major component was shown in case of disorder for clarity. The dotted lines indicate presence of intra or intermolecular interactions.

**(a) NM02:**

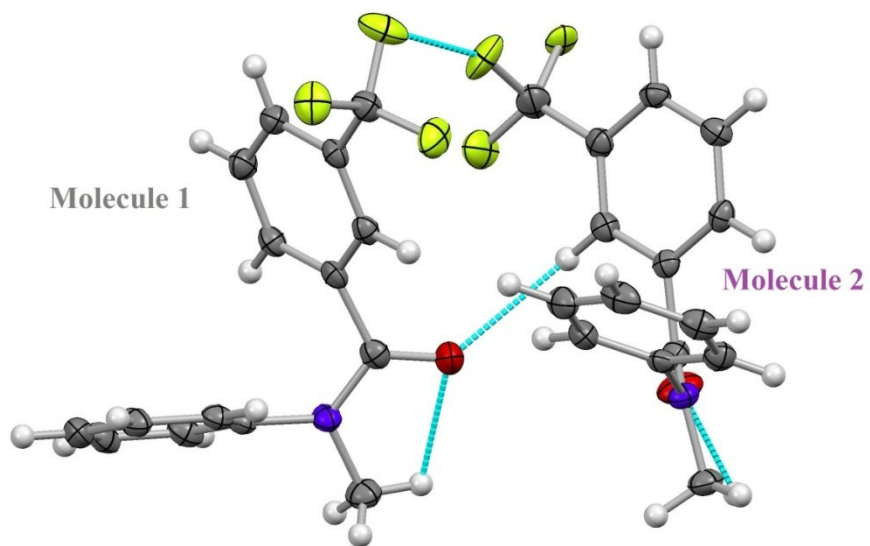

**(b) NM03:**

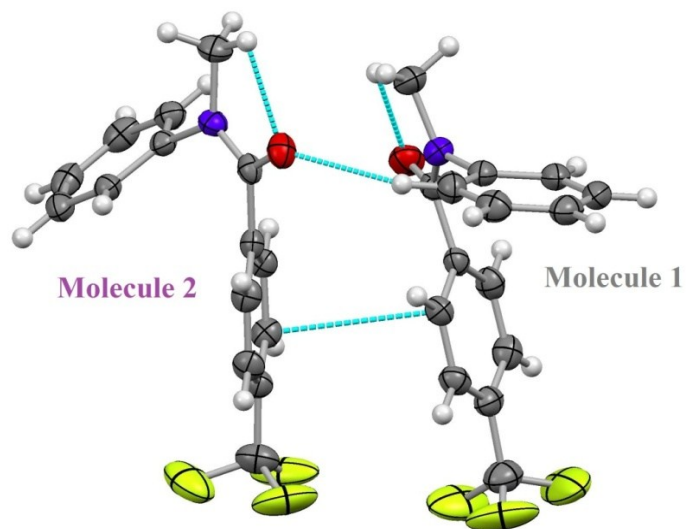

(c) NM10:

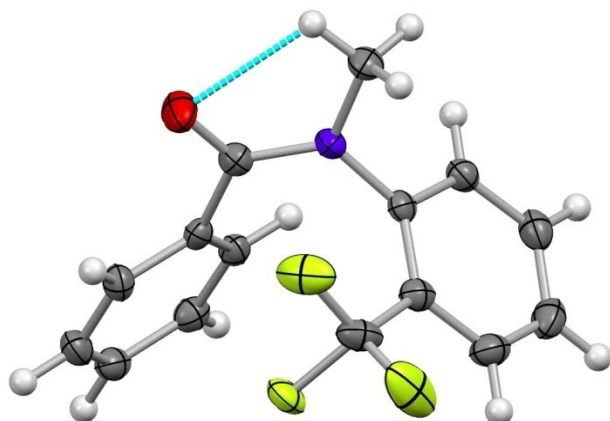

(d) NM30:

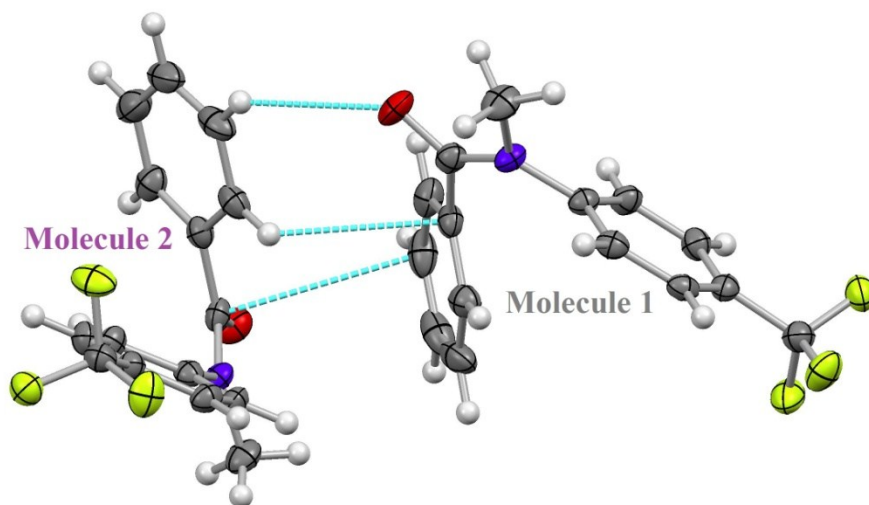

(e) NM11

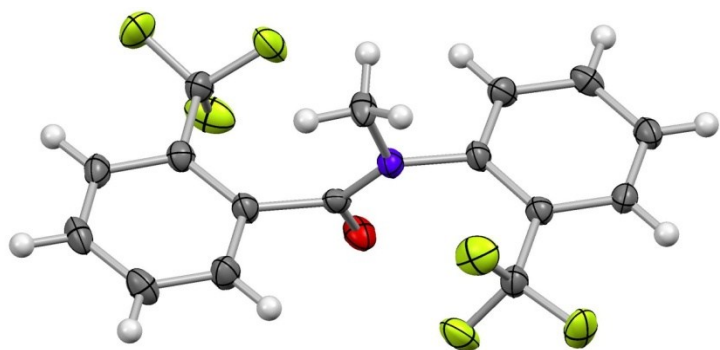

**(f) NM12:**

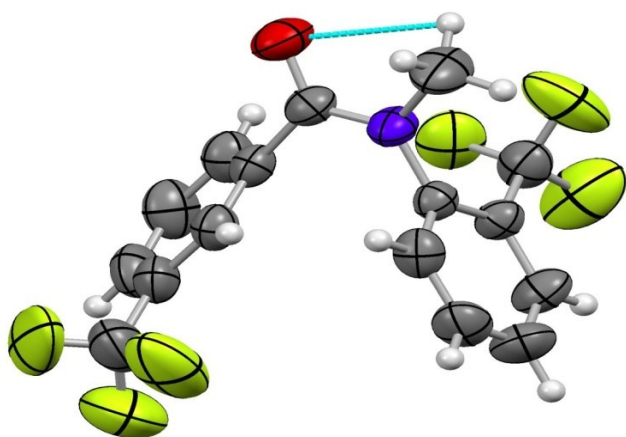

**(g) NM22:**

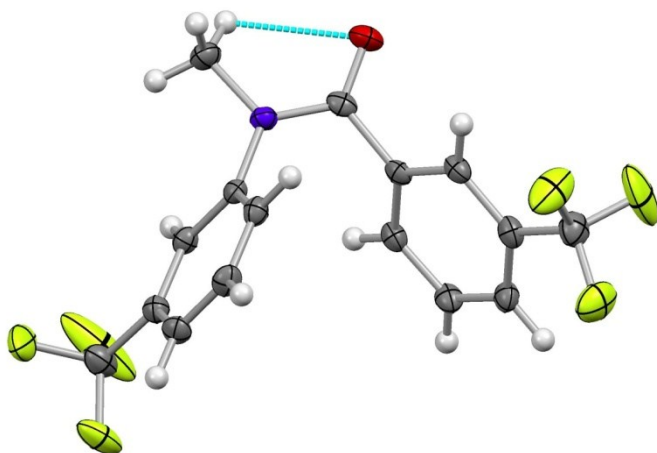

**(h) NM23:**



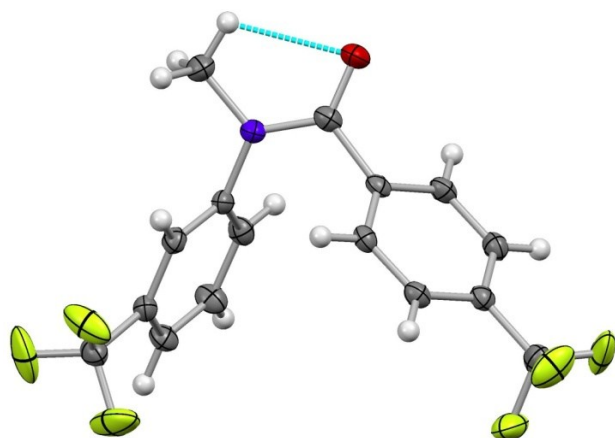

(i) NM31:

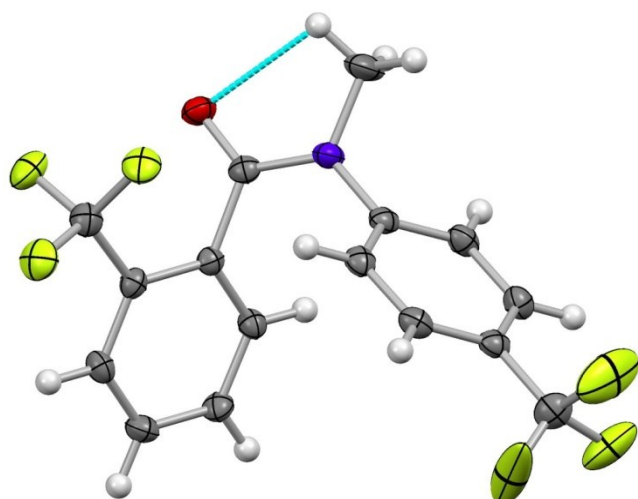

(j) NM33:

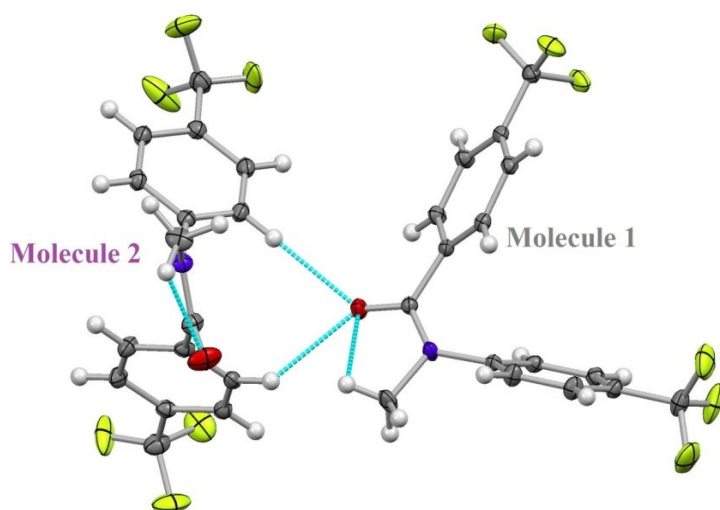

## Section 2: XPac analysis: Comparison of Crystal Structures



**Figure S7:** Presence of 2D supramolecular constructs (SC) in NM02\_1 / NM03\_2

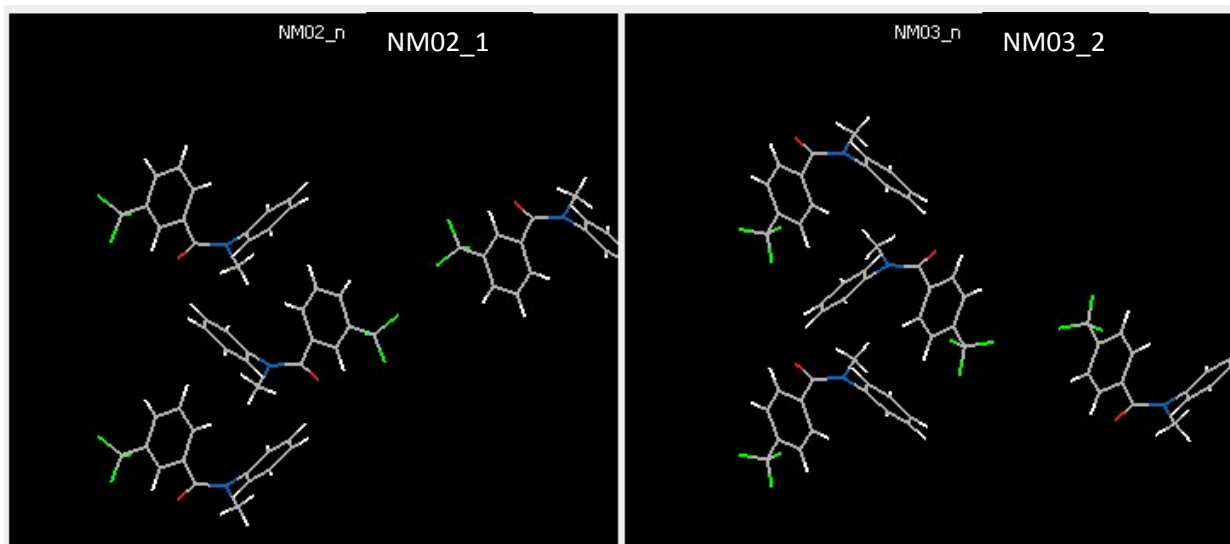

**Figure S8:** Presence of 1D supramolecular constructs (SC)

(a) B1

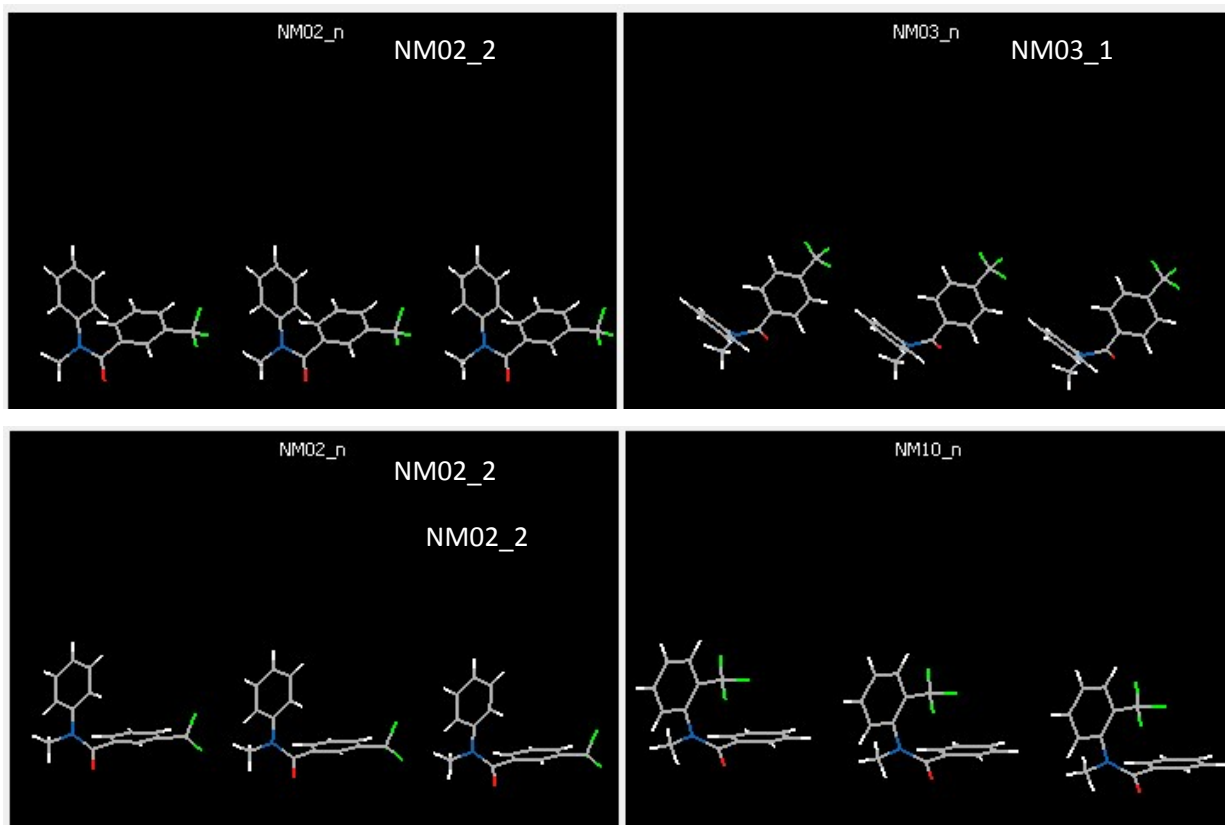

(b) B2

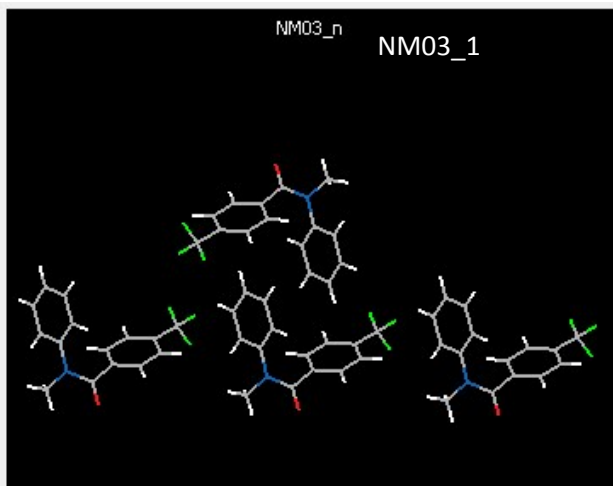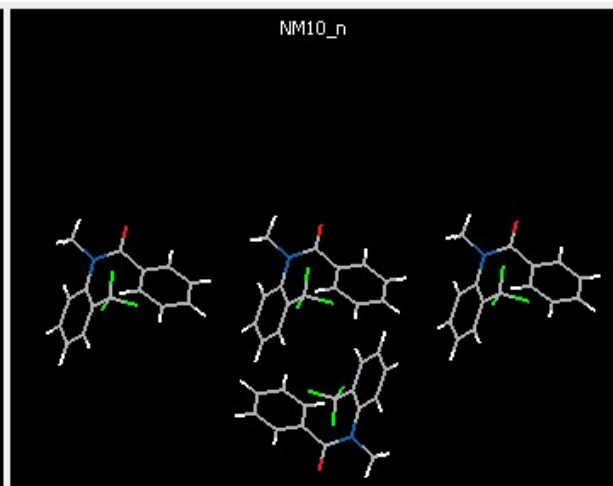

(c) B3:

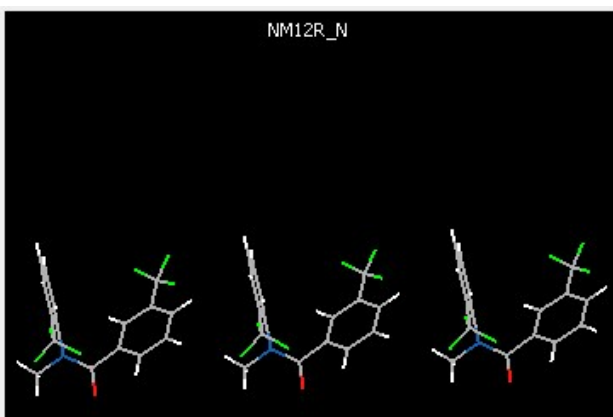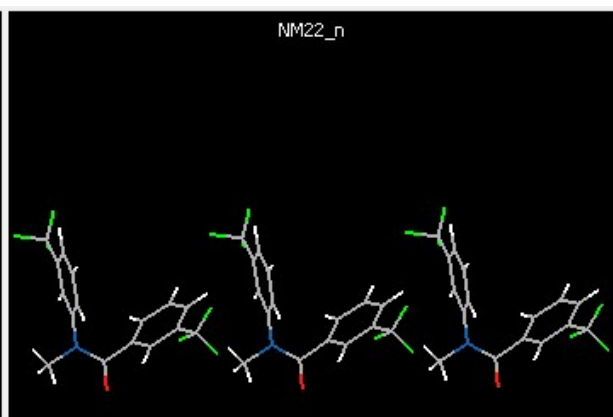

(d) B4:

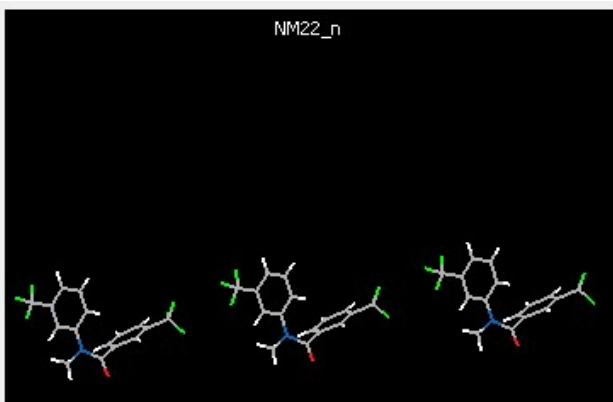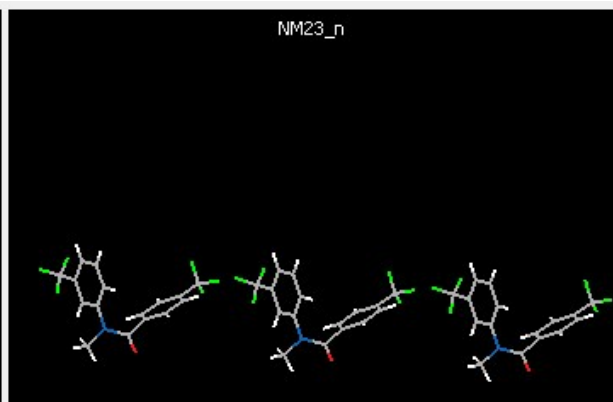

(e) B5:

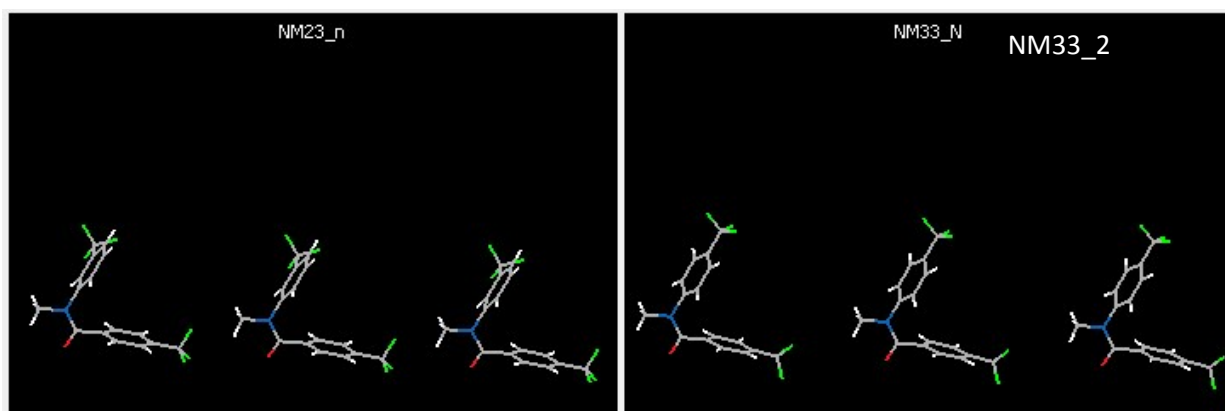

(f) **B6:**

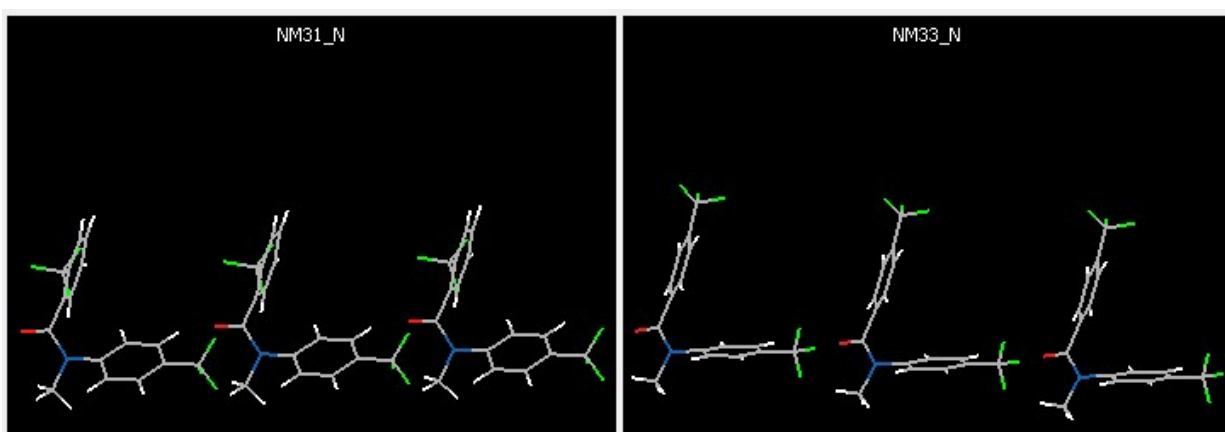

**Figure S9:** Presence of 0D supramolecular constructs (SC)

**(a) A1:**

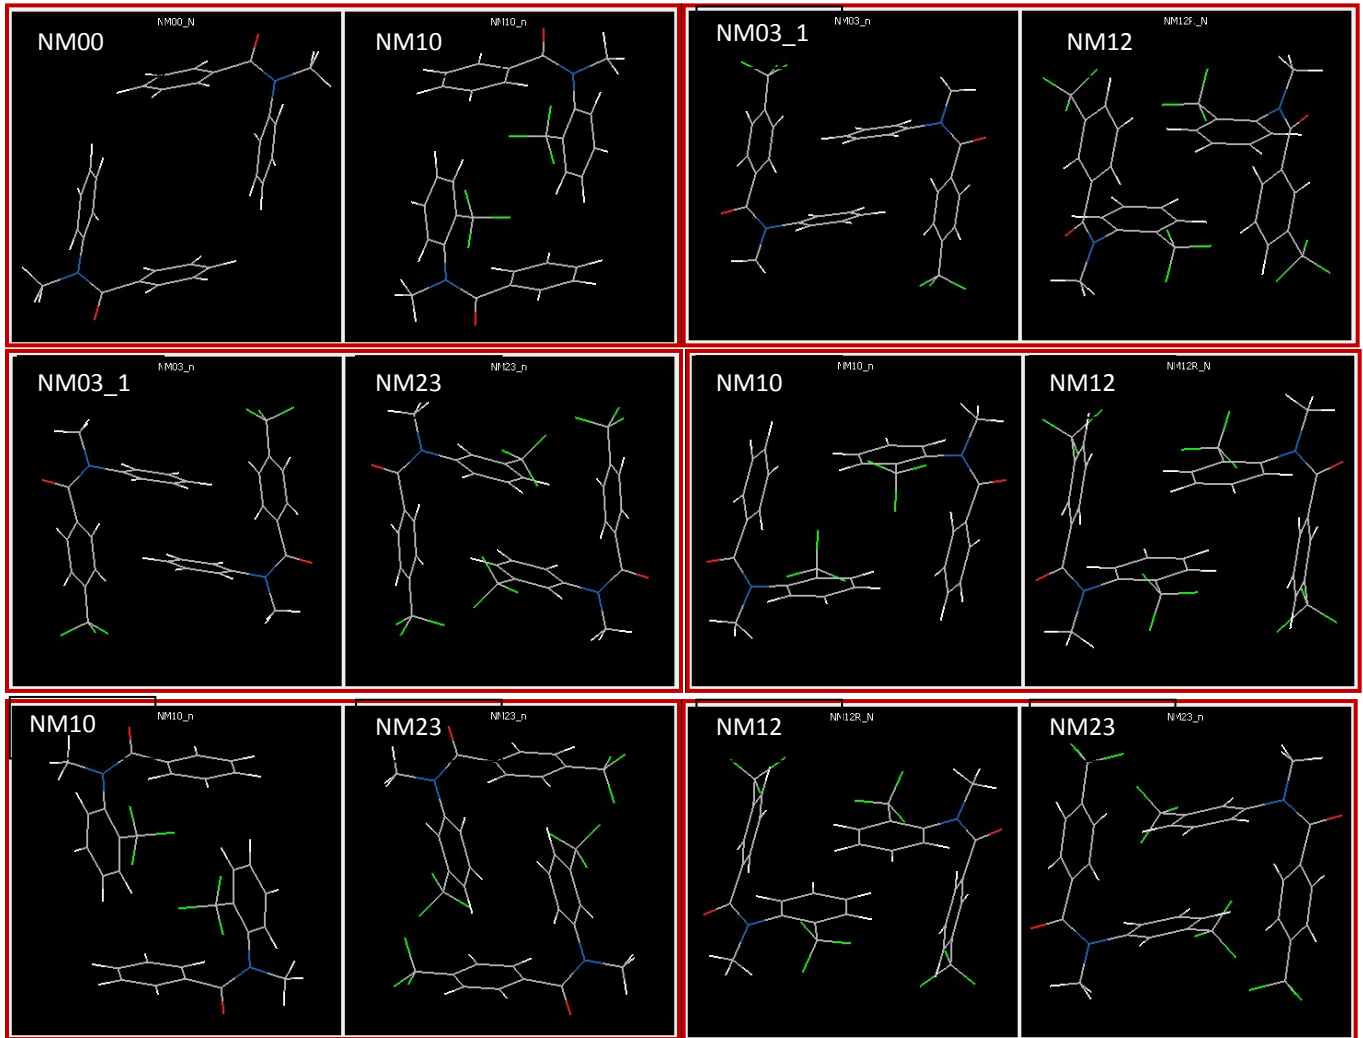

**(b) A2:**

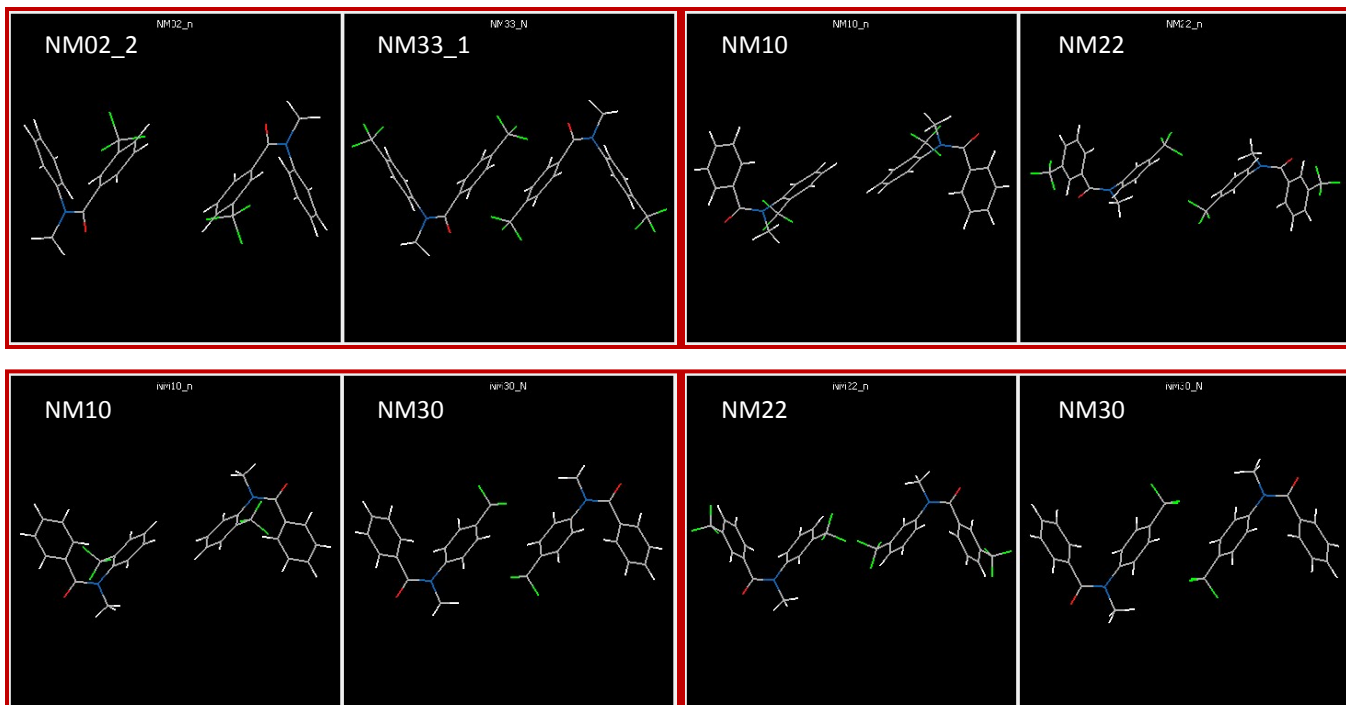

(c) A3:

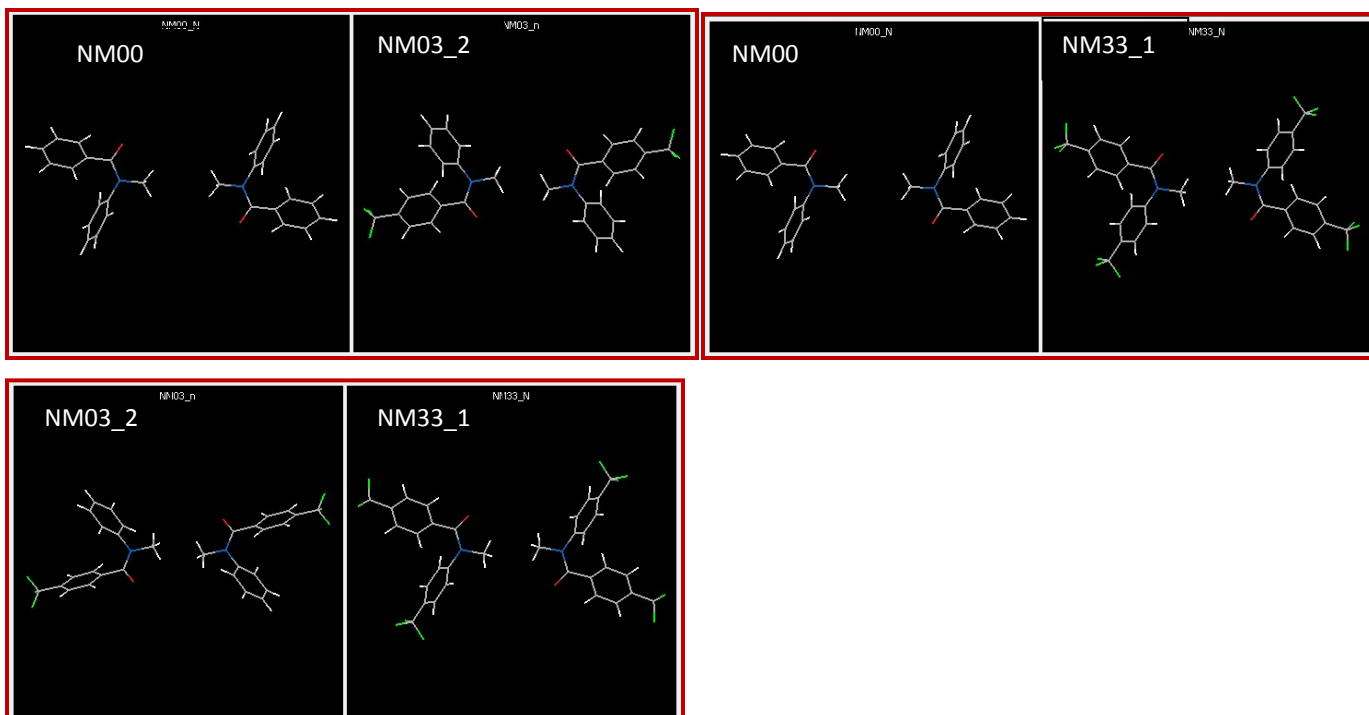

(d) A4:

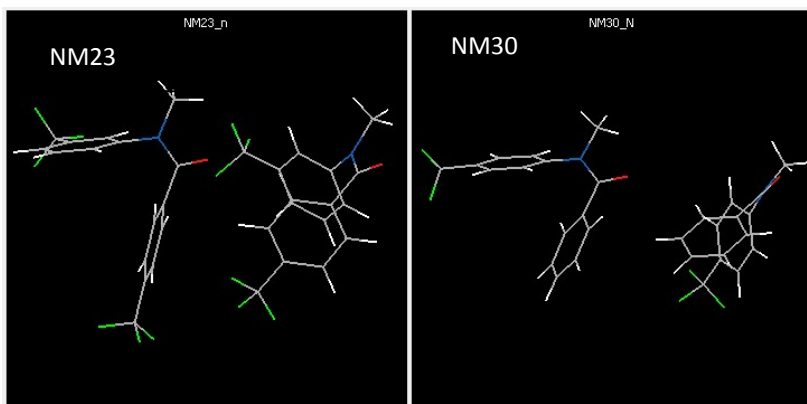

(e) A5:

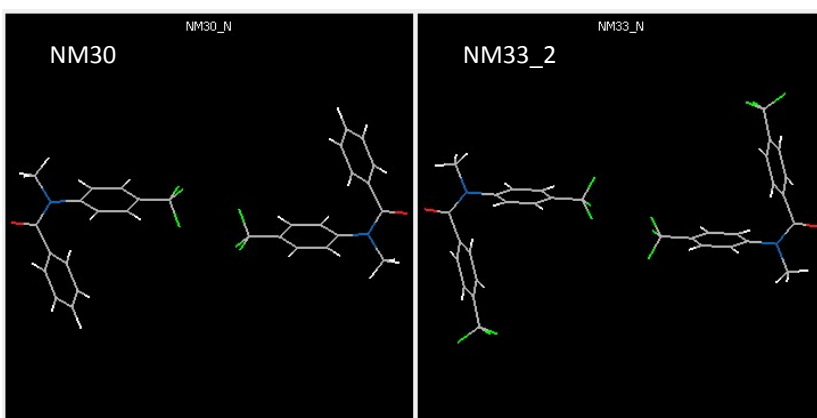

(f) A6:

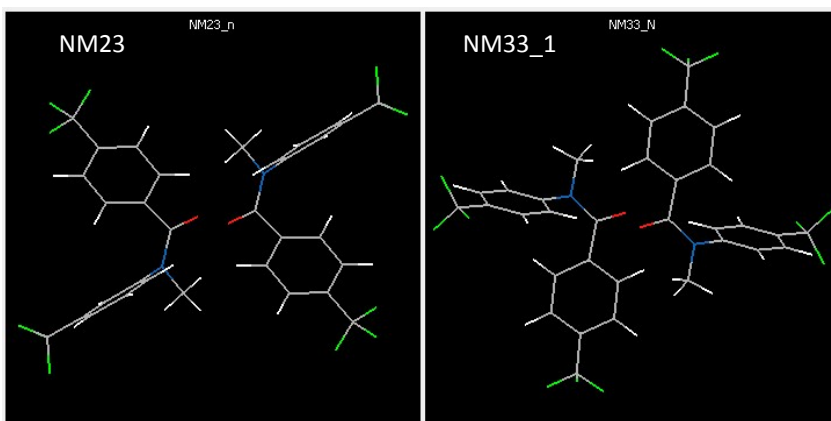

Comparison of crystal structure reported in CSD with the present series by XPac



**Table S2:** Result of XPac analysis with crystal structure reported in CSD

|         | NM00 | NM02_1                     | NM02_2 | NM03_1                     | NM03_2 | NM10                       | NM30_1 | NM30_1 | NM12                       | NM22                       | NM23                       | NM31                       | NM33_1 |
|---------|------|----------------------------|--------|----------------------------|--------|----------------------------|--------|--------|----------------------------|----------------------------|----------------------------|----------------------------|--------|
| YEGKEA  | ---  | ---                        | ---    | <b>0D</b><br><b>(12.1)</b> | ---    | <b>0D</b><br><b>(8.7)</b>  | ---    | ---    | <b>0D</b><br><b>(6.5)</b>  | ---                        | <b>0D</b><br><b>(17.0)</b> | ---                        | ---    |
| YEGKIE  | ---  | ---                        | ---    | ---                        | ---    | ---                        | ---    | ---    | ---                        | ---                        | ---                        | ---                        | ---    |
| YEGKOK  | ---  | <b>0D</b><br><b>(10.5)</b> | ---    | ---                        | ---    | <b>0D</b><br><b>(16.6)</b> | ---    | ---    | <b>0D</b><br><b>(16.2)</b> | <b>0D</b><br><b>(18.9)</b> | ---                        | ---                        | ---    |
| Y EGLAX | ---  | <b>0D</b><br><b>(8.3)</b>  | ---    | <b>1D</b><br><b>(9.7)</b>  | ---    | <b>1D</b><br><b>(15.0)</b> | ---    | ---    | <b>1D</b><br><b>(7.1)</b>  | <b>1D</b><br><b>(7.5)</b>  | ---                        | <b>0D</b><br><b>(14.9)</b> | ---    |

**Figure S10:** Presence of 1D supramolecular constructs (SC)

(a)

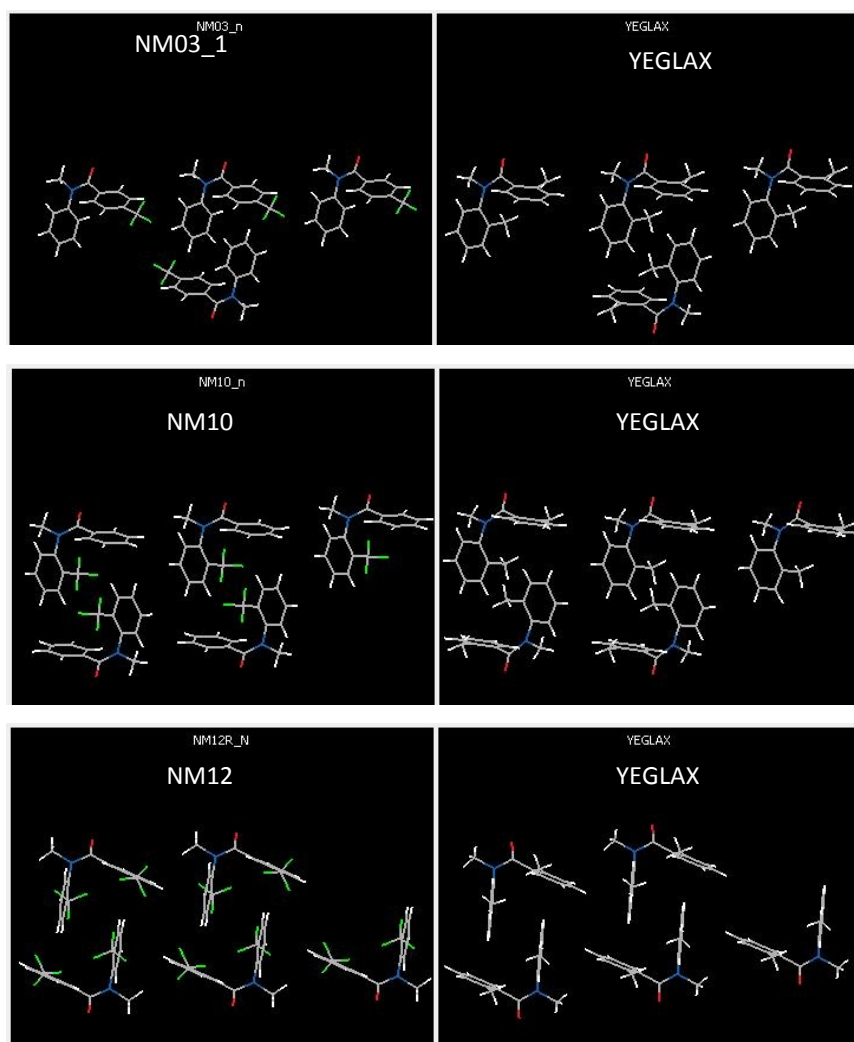

(b)

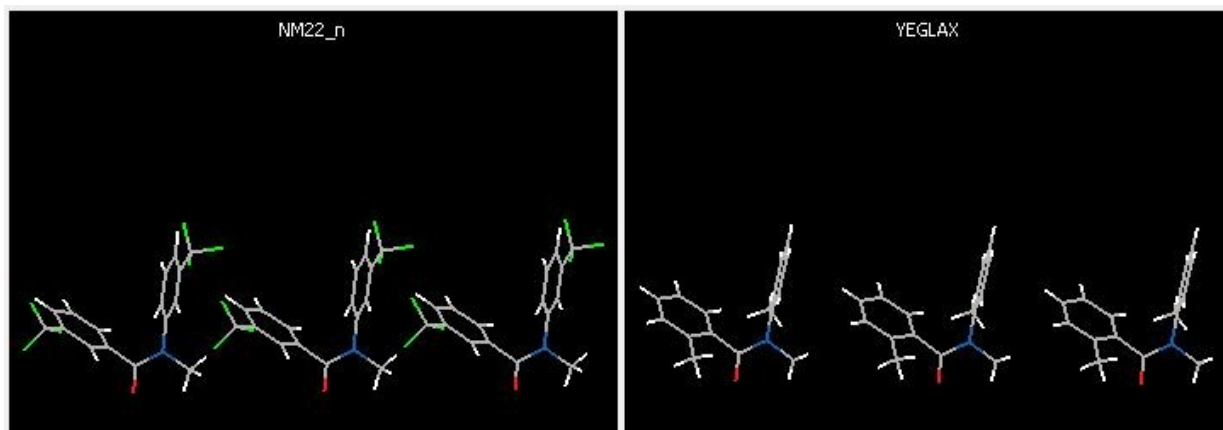

**Figure S11:** Presence of 0D supramolecular constructs (SC)

**(a)**

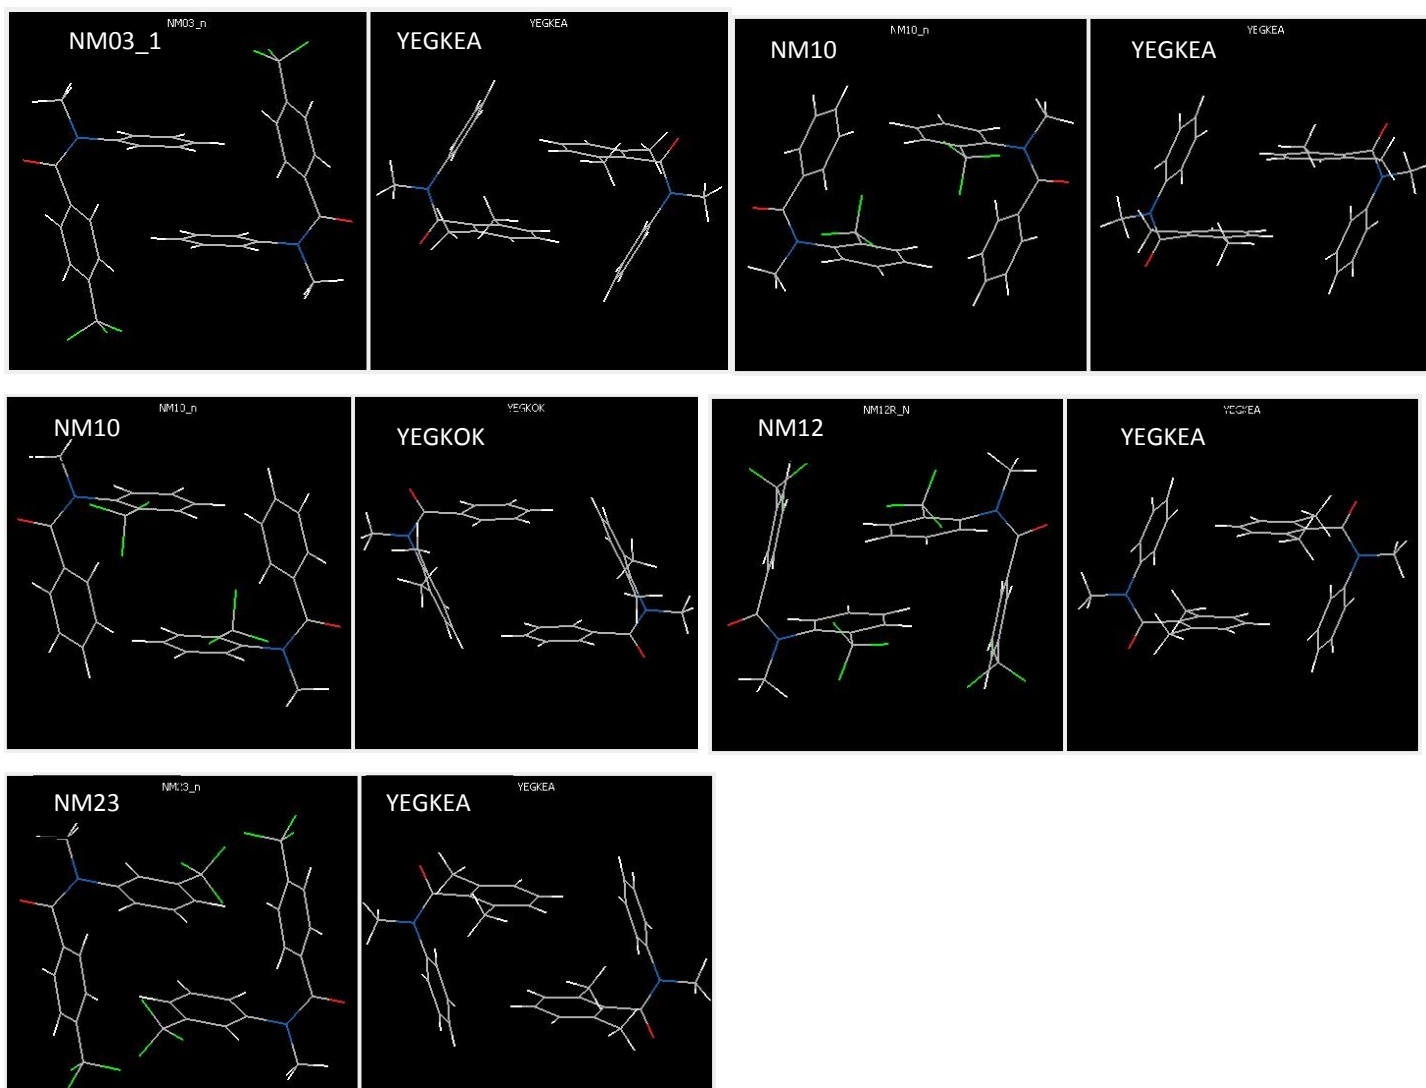

**(b)**

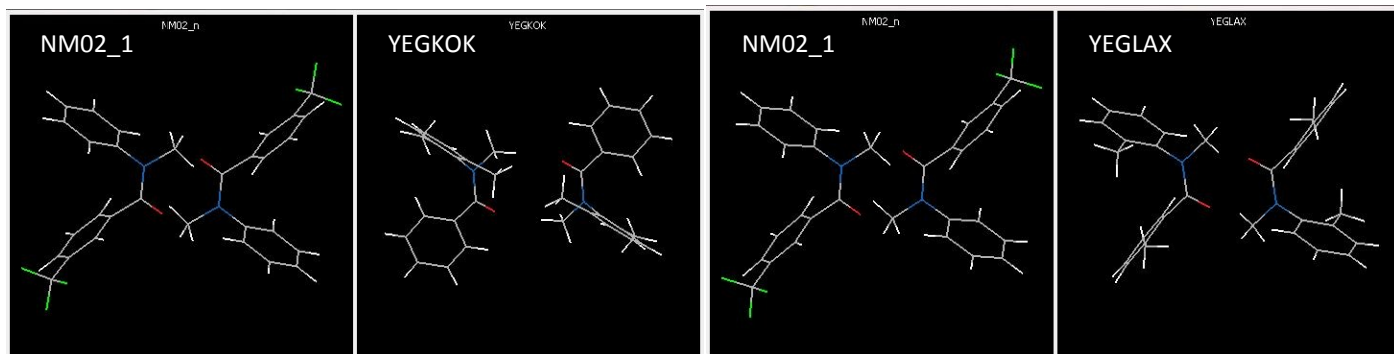

(c)

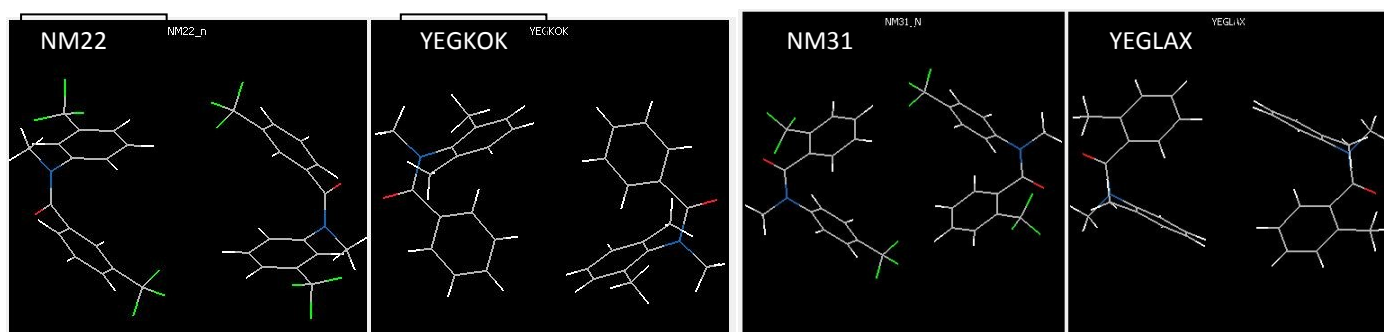

(d)

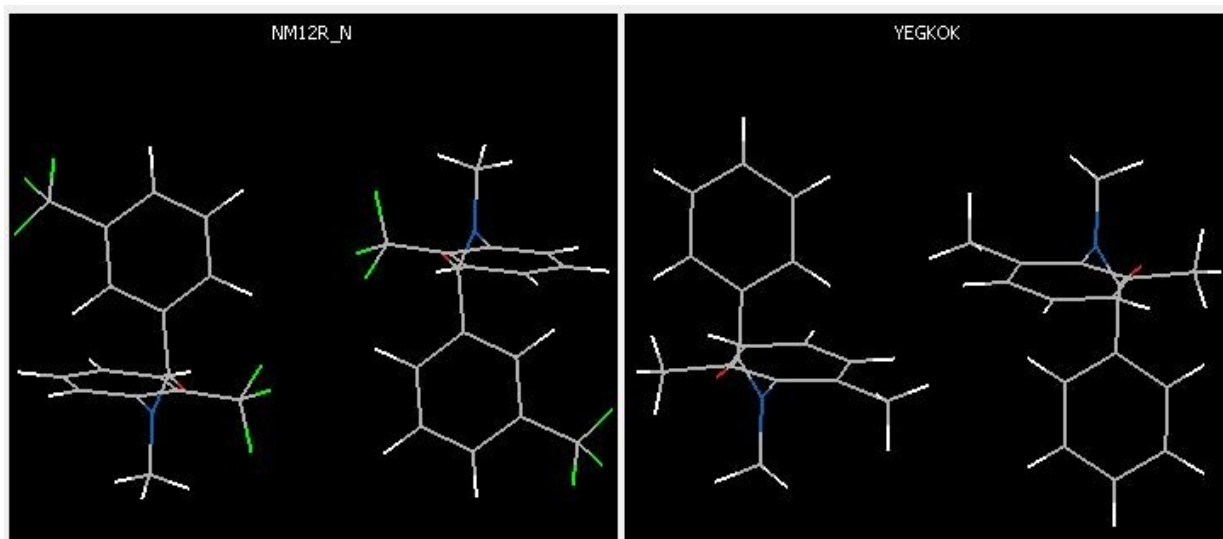

Figure S12: XPac result for comparison of NM11 with molecules reported in CSD having *trans*-geometry (Ref code: YEGJEY, DIBGIF and DIBGAX)

(a) NM11 with DIBGAX\_1 (Dissimilarity index,  $X = 13.3$ )

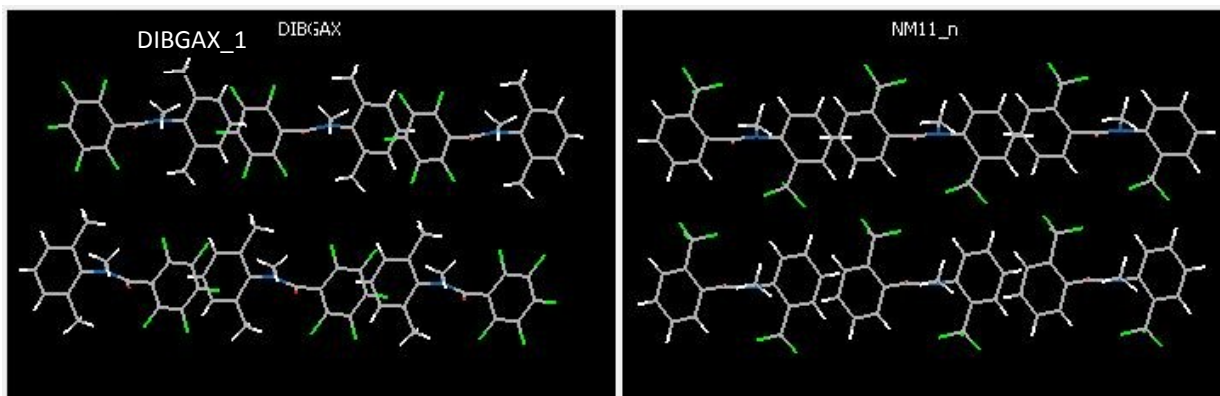

(b) NM11 with DIBGAX\_4 (Dissimilarity index,  $X = 13.3$ )

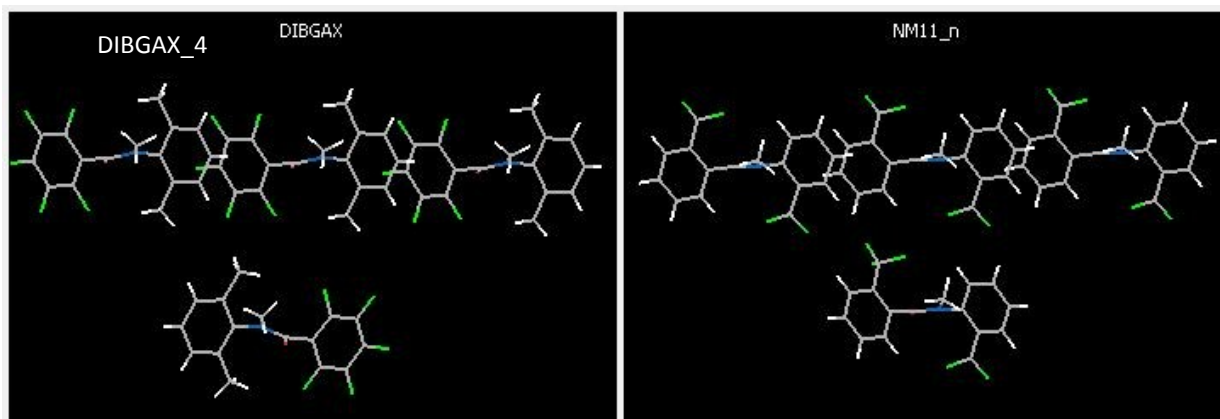

Supplement: c5nj01670c1.pdf [file c5nj01670c1.pdf]
